# Supplementary material for: Integrated Analysis of Tissue-Specific Promoter Methylation and Gene Expression Profile in Complex Diseases
Source: MDPI journal article supplement (doi:10.3390/ijms21145056), 2020-07-17
Supplement: s1 [file s1]

# Table Legends

**Table S1.** 677 Tissue-specific genes

**Table S2.** KEGG pathway in EnrichR (GSEA) ( $p < 0.05$ )

**Table S3.** Top 100 DisGeNet Diseases in EnrichR (GSEA)

**Table S4.** Replication of obesity-associated methylation markers newly identified in the current study

**Table S5.** 449 Tissue-Specific Genes affected by proximal promoter methylation

**Table S6.** Sample information (Number of mapped reads)

**Table S7.** Characteristics of 52 subjects for sequencing data

**Table S8.** General characteristics of the subjects for analysis on obesity-related differentially methylated CpGs (\* BMI > 30 kg/m<sup>2</sup>, † BMI > 27 kg/m<sup>2</sup>)
