# Supplementary material for: Integrated Analysis of Tissue-Specific Promoter Methylation and Gene Expression Profile in Complex Diseases
Source: Int J Mol Sci. 2020 Jul 17;21(14):5056. doi: 10.3390/ijms21145056 (PMC7404266; doi:10.3390/ijms21145056)
Supplement: Supplementary file 1 [file ijms-21-05056-s001.zip]

Archive with 10 entries (10 files):
- Table_S8_General characteristics of the subjects for analysis on obesity-related differentially methylated CpGs.xlsx
- Supplementary Figures and Notes.pdf
- Table Legends.pdf
- Table_S1_677 Tissue-specific genes.xlsx
- Table_S5_449 Tissue Specific Genes affected by proximal promoter methylation.xlsx
- Table_S2_KEGG pathways in EnrichR GSEA.xlsx
- Table_S6_Sample information (Number of mapped reads).xlsx
- Table_S3_Top 100 DisGeNet Diseases in EnrichR GSEA.xlsx
- Table_S7_Characteristics of 52 subjects for sequencing data.xlsx
- Table_S4_Replication of obesity-associated methylation markers newly identified in the current study.xlsx
