# Supplementary material for: Integrated Analysis of Tissue-Specific Promoter Methylation and Gene Expression Profile in Complex Diseases
Source: Int J Mol Sci. 2020 Jul 17;21(14):5056. doi: 10.3390/ijms21145056 (PMC7404266; doi:10.3390/ijms21145056)
Supplement: Supplementary file 1 [file ijms-21-05056-s001.zip › Table_S2_KEGG pathways in EnrichR GSEA.xlsx]

## Sheet: Table S2
Table S2. KEGG pathways in EnrichR GSEA (p < 0.05)
Rank	Term	Overlap	P-value	Adjusted P-value	Odds Ratio	Combined Score	Genes
1	TNF signaling pathway	13/110	4.27901e-08	1.31794e-05	7.01376	119.002	JUN;EDN1;CEBPB;VCAM1;LIF;CXCL1;FOS;CXCL3;CXCL2;NFKBIA;SOCS3;IRF1;JUNB
2	Fluid shear stress and atherosclerosis	12/139	4.23591e-06	0.00065233	5.1235	63.3875	JUN;EDN1;VCAM1;PRKAA2;GSTP1;MGST1;BCL2;PLAT;CYBA;FOS;PRKCZ;KLF2
3	AGE-RAGE signaling pathway in diabetic complications	10/100	7.30163e-06	0.000749634	5.93472	70.1924	STAT5A;JUN;EDN1;VCAM1;COL4A2;PIM1;BCL2;VEGFB;PRKCZ;FOXO1
4	Pathways in cancer	24/530	1.2448e-05	0.000958498	2.68742	30.3516	STAT5A;JUN;EDN1;EGLN3;GADD45B;JUP;WNT5B;LAMB3;FZD4;GSTP1;ITGA2;MGST1;VEGFB;SLC2A1;LAMC2;FOS;FOXO1;ADCY5;NFKBIA;HEY1;PAX8;COL4A2;PIM1;BCL2
5	Alanine, aspartate and glutamate metabolism	6/35	2.35233e-05	0.00144904	10.1738	108.427	ALDH4A1;ALDH5A1;GLS2;GPT2;ADSSL1;GLUL
6	IL-17 signaling pathway	9/93	2.7315e-05	0.00140217	5.74328	60.3508	NFKBIA;CEBPB;JUN;JUND;FOSB;CXCL1;FOS;CXCL3;CXCL2
7	Relaxin signaling pathway	10/130	7.20179e-05	0.00316879	4.56517	43.5453	NFKBIA;SHC2;JUN;EDN1;COL4A2;VEGFB;ARRB1;FOS;PRKCZ;ADCY5
8	Glyoxylate and dicarboxylate metabolism	5/30	0.000132886	0.00511611	9.8912	88.289	SHMT1;GLYCTK;CAT;HOGA1;GLUL
9	MAPK signaling pathway	15/295	0.000156051	0.0053404	3.01765	26.4507	NTRK2;JUN;JUND;GADD45B;HSPA6;VEGFB;ARRB1;FOS;MAPK8IP2;DUSP6;MAPK8IP1;NR4A1;RPS6KA1;MAPT;EPHA2
10	Human papillomavirus infection	16/330	0.000163916	0.00504862	2.87744	25.0802	WNT5B;LAMB3;FZD4;ITGB4;ITGA2;TNC;PPP2R5A;LAMC2;PRKCZ;FOXO1;PPP2R1B;HEY1;COL4A2;PARD3;IRF1;ITGA7
11	Transcriptional misregulation in cancer	11/186	0.000329207	0.0092178	3.50978	28.1443	CEBPB;NR4A3;CDKN2C;GADD45B;JUP;BCL6;PAX8;PLAU;PLAT;FOXO1;DUSP6
12	ECM-receptor interaction	7/82	0.000466815	0.0119816	5.06622	38.8558	COL4A2;LAMB3;ITGB4;ITGA2;TNC;ITGA7;LAMC2
13	Insulin resistance	8/108	0.000488264	0.0115681	4.39609	33.5186	NFKBIA;SOCS3;PRKAA2;RPS6KA1;SLC2A1;PRKCZ;ACACB;FOXO1
14	Insulin signaling pathway	9/137	0.000533401	0.0117348	3.89872	29.3817	LIPE;SOCS3;SHC2;PRKAA2;FASN;PRKCZ;ACACB;FOXO1;HK2
15	Focal adhesion	11/199	0.000582359	0.0119578	3.2805	24.4345	JUN;SHC2;COL4A2;LAMB3;ITGB4;ITGA2;VEGFB;TNC;BCL2;ITGA7;LAMC2
16	AMPK signaling pathway	8/120	0.000979654	0.0188583	3.95648	27.4117	LIPE;PFKFB3;PRKAA2;PPP2R1B;FASN;PPP2R5A;ACACB;FOXO1
17	Small cell lung cancer	7/93	0.000993998	0.0180089	4.46699	30.8838	NFKBIA;COL4A2;LAMB3;GADD45B;ITGA2;BCL2;LAMC2
18	Amphetamine addiction	6/68	0.000995698	0.0170375	5.23652	36.1951	JUN;MAOA;FOSB;FOS;STX1A;ADCY5
19	PI3K-Akt signaling pathway	15/354	0.00105137	0.0170433	2.51471	17.245	NTRK2;PRKAA2;LAMB3;ITGB4;ITGA2;VEGFB;TNC;PPP2R5A;LAMC2;NR4A1;PPP2R1B;COL4A2;BCL2;ITGA7;EPHA2
20	Adipocytokine signaling pathway	6/69	0.00107533	0.01656	5.16062	35.2736	NFKBIA;SOCS3;PRKAA2;ACSL1;SLC2A1;ACACB
21	Prolactin signaling pathway	6/70	0.00115975	0.0170096	5.0869	34.3852	STAT5A;SOCS3;SHC2;CISH;IRF1;FOS
22	Fatty acid biosynthesis	3/13	0.00119619	0.0167466	13.6955	92.1518	ACSL1;FASN;ACACB
23	Osteoclast differentiation	8/127	0.00141242	0.0189142	3.73841	24.5331	NFKBIA;SOCS3;JUN;JUND;FOSB;CYBA;FOS;JUNB
24	beta-Alanine metabolism	4/31	0.00173949	0.0223234	7.6577	48.6583	ALDH1A3;ALDH6A1;AOC2;ALDH2
25	Legionellosis	5/55	0.00230117	0.0283504	5.3952	32.7723	NFKBIA;HSPA6;CXCL1;CXCL3;CXCL2
26	Phenylalanine metabolism	3/17	0.00270554	0.0320502	10.473	61.9213	ALDH1A3;AOC2;MAOA
27	Tyrosine metabolism	4/36	0.0030485	0.0347755	6.59413	38.2005	ALDH1A3;AOC2;MAOA;FAH
28	Glycerolipid metabolism	5/61	0.00362596	0.0398855	4.86452	27.3369	ALDH2;GPAM;GLYCTK;AGPAT2;PNPLA2
29	Human T-cell leukemia virus 1 infection	10/219	0.00414282	0.0439996	2.70992	14.8676	STAT5A;NFKBIA;JUN;HLA-DMA;ZFP36;CDKN2C;SLC2A1;FOS;NFATC4;ADCY5
30	Glycine, serine and threonine metabolism	4/40	0.00448711	0.0460676	5.93472	32.0863	AOC2;MAOA;SHMT1;GLYCTK
31	Arginine biosynthesis	3/21	0.00503477	0.0500229	8.47817	44.8613	GLS2;GPT2;GLUL
32	Chemokine signaling pathway	9/190	0.00505046	0.0486107	2.81118	14.8663	NFKBIA;SHC2;PARD3;CXCL1;ARRB1;CXCL3;PRKCZ;CXCL2;ADCY5
33	Tryptophan metabolism	4/42	0.00535305	0.0499618	5.65211	29.561	ALDH2;MAOA;CAT;HADH
34	NF-kappa B signaling pathway	6/95	0.00542094	0.0491073	3.74824	19.5564	NFKBIA;VCAM1;GADD45B;PLAU;BCL2;CXCL2
35	Prostate cancer	6/97	0.0059945	0.0527516	3.67096	18.784	NFKBIA;PLAU;GSTP1;BCL2;PLAT;FOXO1
36	JAK-STAT signaling pathway	8/162	0.00628868	0.0538031	2.93072	14.8559	STAT5A;SOCS3;CISH;FHL1;PIM1;LIF;BCL2;IL20RB
37	Fatty acid degradation	4/44	0.0063241	0.0526439	5.3952	27.318	ALDH2;ACSL1;HADH;ACADS
38	Histidine metabolism	3/23	0.00653984	0.0530071	7.74094	38.9357	ALDH1A3;ALDH2;MAOA
39	HIF-1 signaling pathway	6/100	0.00693603	0.0547769	3.56083	17.701	EDN1;EGLN3;PFKFB3;BCL2;SLC2A1;HK2
40	Arrhythmogenic right ventricular cardiomyopathy (ARVC)	5/72	0.00734331	0.0565435	4.12133	20.2521	JUP;ITGB4;ITGA2;ITGA7;DSG2
41	Leishmaniasis	5/74	0.0082284	0.0618134	4.00994	19.2484	NFKBIA;HLA-DMA;JUN;CYBA;FOS
42	PPAR signaling pathway	5/74	0.0082284	0.0603416	4.00994	19.2484	FABP5;ACSL1;PLIN4;PLIN2;ANGPTL4
43	Valine, leucine and isoleucine degradation	4/48	0.00860197	0.0616141	4.9456	23.5201	ALDH6A1;ALDH2;HADH;ACADS
44	Estrogen signaling pathway	7/137	0.00864278	0.0604995	3.03234	14.4067	SHC2;JUN;HSPA6;BCL2;FOS;FKBP5;ADCY5
45	Parathyroid hormone synthesis, secretion and action	6/106	0.00913315	0.0625113	3.35927	15.7746	NR4A2;JUND;BCL2;ARRB1;FOS;ADCY5
46	Arginine and proline metabolism	4/49	0.00924487	0.0619004	4.84467	22.6909	ALDH4A1;ALDH2;MAOA;HOGA1
47	Cocaine addiction	4/49	0.00924487	0.0605834	4.84467	22.6909	JUN;MAOA;FOSB;ADCY5
48	Apoptosis	7/143	0.0107926	0.0692528	2.90511	13.1569	NFKBIA;JUN;GADD45B;BCL2;TNFRSF10A;FOS;TUBA4A
49	NOD-like receptor signaling pathway	8/178	0.0108005	0.067889	2.66729	12.0779	NFKBIA;JUN;NAMPT;BCL2;CYBA;CXCL1;CXCL3;CXCL2
50	Butanoate metabolism	3/28	0.0113717	0.0700495	6.35863	28.4652	ALDH5A1;HADH;ACADS
51	Axon guidance	8/181	0.0118605	0.071628	2.62308	11.6322	EFNB1;WNT5B;PARD3;SEMA3A;SLIT2;PRKCZ;EPHA2;NFATC4
52	Toxoplasmosis	6/113	0.0122778	0.0727224	3.15118	13.8651	NFKBIA;HLA-DMA;LAMB3;HSPA6;BCL2;LAMC2
53	Breast cancer	7/147	0.0124264	0.0722138	2.82606	12.4005	SHC2;JUN;WNT5B;GADD45B;HEY1;FZD4;FOS
54	Regulation of lipolysis in adipocytes	4/55	0.0137605	0.078486	4.31616	18.4988	LIPE;NPR1;ADCY5;PNPLA2
55	Kaposi sarcoma-associated herpesvirus infection	8/186	0.0137945	0.0772492	2.55257	10.9339	NFKBIA;ZFP36;JUN;CXCL1;FOS;CXCL3;CXCL2;NFATC4
56	Hypertrophic cardiomyopathy (HCM)	5/85	0.0144409	0.0794248	3.49101	14.7938	EDN1;PRKAA2;ITGB4;ITGA2;ITGA7
57	Circadian rhythm	3/31	0.0150365	0.0812498	5.74328	24.1061	PER1;PRKAA2;CRY2
58	Salmonella infection	5/86	0.0151271	0.08033	3.45042	14.4616	JUN;CXCL1;FOS;CXCL3;CXCL2
59	Neurotrophin signaling pathway	6/119	0.0155224	0.081032	2.99229	12.4643	NFKBIA;NTRK2;SHC2;JUN;RPS6KA1;BCL2
60	Protein digestion and absorption	5/90	0.0180892	0.0928581	3.29707	13.2293	COL18A1;COL4A2;CTRL;COL7A1;SLC3A1
61	Rheumatoid arthritis	5/91	0.0188854	0.0953557	3.26083	12.9434	HLA-DMA;JUN;TNFSF13;CXCL1;FOS
62	Th1 and Th2 cell differentiation	5/92	0.0197042	0.0978855	3.22539	12.6659	STAT5A;NFKBIA;HLA-DMA;JUN;FOS
63	Dopaminergic synapse	6/131	0.0237011	0.115872	2.71819	10.1721	PPP2R1B;KIF5C;MAOA;PPP2R5A;FOS;ADCY5
64	FoxO signaling pathway	6/132	0.0244913	0.117864	2.6976	10.0066	PRKAA2;GADD45B;BCL6;CAT;FOXO1;KLF2
65	Aldosterone synthesis and secretion	5/98	0.0251066	0.118967	3.02792	11.1567	NR4A2;LIPE;NR4A1;NPR1;ADCY5
66	Acute myeloid leukemia	4/66	0.0252096	0.117645	3.5968	13.2381	STAT5A;JUP;PIM1;DUSP6
67	Tight junction	7/170	0.0254072	0.116797	2.44371	8.97506	JUN;PRKAA2;PPP2R1B;PARD3;PRKCZ;TUBA4A;CGNL1
68	Influenza A	7/171	0.0261245	0.118329	2.42942	8.85493	NFKBIA;SOCS3;DNAJB1;JUN;HLA-DMA;HSPA6;TNFRSF10A
69	cAMP signaling pathway	8/212	0.0276916	0.123609	2.23952	8.0323	NFKBIA;LIPE;JUN;EDN1;PDE10A;NPR1;FOS;ADCY5
70	Pyruvate metabolism	3/39	0.0277135	0.121939	4.56517	16.3699	PC;ALDH2;ACACB
71	Longevity regulating pathway	5/102	0.0291884	0.12662	2.90918	10.281	PRKAA2;HSPA6;CAT;FOXO1;ADCY5
72	Measles	6/138	0.0296033	0.126636	2.58031	9.08236	STAT5A;NFKBIA;JUN;HSPA6;BCL2;FOS
73	Glucagon signaling pathway	5/103	0.0302704	0.127716	2.88093	10.0763	PRKAA2;SLC2A1;SIK2;ACACB;FOXO1
74	Th17 cell differentiation	5/107	0.0348493	0.145048	2.77323	9.30897	STAT5A;NFKBIA;JUN;HLA-DMA;FOS
75	Chronic myeloid leukemia	4/76	0.0394486	0.162002	3.12354	10.0976	STAT5A;NFKBIA;SHC2;GADD45B
76	Pertussis	4/76	0.0394486	0.159871	3.12354	10.0976	C4B;JUN;IRF1;FOS
77	Gastric cancer	6/149	0.0406933	0.162773	2.38982	7.65147	SHC2;WNT5B;GADD45B;JUP;FZD4;BCL2
78	Type II diabetes mellitus	3/46	0.0422694	0.16691	3.87047	12.245	SOCS3;PRKCZ;HK2
79	Complement and coagulation cascades	4/79	0.0444536	0.173313	3.00492	9.35525	C4B;CFD;PLAU;PLAT
80	Oxytocin signaling pathway	6/153	0.0452979	0.174397	2.32734	7.20194	JUN;PRKAA2;NPR1;FOS;NFATC4;ADCY5
81	Cushing syndrome	6/155	0.0477171	0.181443	2.29731	6.98949	NR4A1;RASD1;CDKN2C;WNT5B;FZD4;ADCY5
82	Chemical carcinogenesis	4/82	0.0497977	0.187045	2.89498	8.68433	SULT1A1;ALDH1A3;GSTP1;MGST1
* Bold terms are diabetes- and obesity-related pathyways
