# Supplementary material for: Integrated Analysis of Tissue-Specific Promoter Methylation and Gene Expression Profile in Complex Diseases
Source: Int J Mol Sci. 2020 Jul 17;21(14):5056. doi: 10.3390/ijms21145056 (PMC7404266; doi:10.3390/ijms21145056)
Supplement: Supplementary file 1 [file ijms-21-05056-s001.zip › Table_S3_Top 100 DisGeNet Diseases in EnrichR GSEA.xlsx]

## Sheet: Table S3
Table S3. Top 100 DisGeNet Diseases in EnrichR GSEA
Rank	Term	Overlap	P-value	Adjusted P-value	Odds Ratio	Combined Score	Genes
1	Neoplasm Metastasis	133/3920	1.77571e-17	1.74517e-13	2.01357	77.6627	LY6K;CD83;CD82;TNC;PLAT;TM7SF2;CDH6;ZFP36;EFEMP1;PLAU;NAMPT;RPS6KA1;ZC3H12A;PDK4;PIM1;GLUL;JUNB;IER2;SOX4;ENTPD1;CISH;S100A2;WNT5B;DKK3;IFI27;COL4A2;PARD3;TRIB1;STX1A;EPHA2;FKBP5;LXN;MAOA;NDRG2;FBLN5;FOXO1;RAP1GAP;SULT1A1;EFNB1;SOCS3;S100A16;HIVEP3;APOE;IGFBP6;STAT5A;JUN;JUND;VCAM1;MCAM;TNFSF13;LIF;TNFRSF10C;MICAL2;TNFRSF10A;NFKBIA;FERMT1;NR4A1;NR4A3;BCL6;FASN;BCL2;MUC20;CDKN1C;COL18A1;BTG2;TINAG…
2	Carcinogenesis	132/4065	1.01034e-15	4.96481e-12	1.92714	66.5413	CD82;ITSN1;TNC;PLAT;TM7SF2;ZFP36;EFEMP1;PPP2R1B;RASSF4;PLAU;NAMPT;RPS6KA1;ZC3H12A;PIM1;JUNB;SOX4;CISH;S100A2;WNT5B;CLEC11A;CASK;TUBA4A;DKK3;CCDC80;IFI27;PARD3;RBP1;TRIB1;EPHA2;LXN;PFKFB3;MAOA;SHMT1;MGST1;NDRG2;PRKCZ;FBLN5;FOXO1;RAP1GAP;SULT1A1;EFNB1;SOCS3;NUAK2;PDZD2;S100A16;APOE;STAT5A;JUN;JUND;VCAM1;GADD45B;FZD4;MCAM;TNFSF13;LIF;TNFRSF10C;TNFRSF10A;NFKBIA;FERMT1;NR4A1;NR4A3;BCL6;FASN;BCL2;MUC20…
3	Lung Neoplasms	60/1177	1.04789e-14	3.4329e-11	3.02534	97.3841	CDKN1C;COL18A1;CD83;ITGB4;TNC;SLC2A1;ARRB1;HK2;TM7SF2;EFEMP1;PPP2R1B;HEY1;ALDH2;PLAU;RPS6KA1;PIM1;GLUL;JUNB;IER2;SOX4;EDN1;S100A2;GPX3;ITGA2;FOS;DKK3;RHOB;PTP4A3;CDCP1;GPRC5A;IRF1;MMP19;ANG;EPHA2;CEBPB;SHMT1;GSTP1;SEMA3A;ERV3-1;MGST1;PRKCZ;FBLN5;SULT1A1;SOCS3;MUC1;ABI3BP;SNCG;APOE;STAT5A;NTRK2;JUN;CADM4;JUND;GSN;NFKBIA;FERMT1;NR4A1;FASN;BCL2;FOSB
4	Glioma	87/2211	1.8324e-14	4.50221e-11	2.33524	73.8648	CDKN1C;COL18A1;BTG2;ITSN1;TNC;SLC2A1;TNFAIP2;MT1X;PLAT;ARRB1;CXCL1;LAMC2;CXCL3;CXCL2;HK2;ZFP36;EFEMP1;RASSF4;PLAU;NAMPT;MYBL2;GLUL;JUNB;SOX4;PSD;KDM6B;ENTPD1;EDN1;CISH;ABCC6;FOS;DKK3;ALDH1A3;PTP4A3;IFI27;IRF1;RBP1;CAT;MMP19;ATF5;TRIB1;STX1A;EPHA2;FKBP5;CEBPB;PRKAA2;GLS2;GSTP1;SEMA3A;ADAM22;AKAP6;AEBP1;NDRG2;FOXO1;SULT1A1;SOCS3;HLA-DMA;S100A16;ORMDL3;LRIG1;IGFBP6;RHPN2;SLIT2;CDK18;NTRK2;JUN;EGLN3;…
5	Malignant neoplasm of prostate	111/3239	1.86123e-14	3.65843e-11	2.03382	64.2991	CD82;ITSN1;TNC;MT1X;PLAT;TM7SF2;ZFP36;EFEMP1;PLAU;RPS6KA1;PIM1;JUNB;SOX4;TMOD1;CISH;S100A2;USP2;RNASE4;MAPK8IP2;DKK3;IFI27;PARD3;RBP1;SIK2;TRIB1;EPHA2;FKBP5;LXN;MAOA;NPR1;SHMT1;NDRG2;PRKCZ;FBLN5;FOXO1;SULT1A1;SOCS3;PDZD2;S100A16;APOE;IGFBP6;STAT5A;JUN;CADM4;JUND;VCAM1;GADD45B;JUP;FZD4;MCAM;HSPA6;LIF;TNFRSF10C;MICAL2;TNFRSF10A;NFKBIA;NR4A2;NR4A1;NR4A3;CTRL;FASN;BCL2;CDKN1C;COL18A1;BTG2;SLC2A1;CXCL…
6	Mammary Neoplasms	91/2387	2.47003e-14	4.04591e-11	2.2625	70.8886	CDKN1C;COL18A1;BTG2;SYNM;CD82;ITGB4;TNC;SLC2A1;MT1X;PLAT;CXCL1;LAMC2;CXCL3;CXCL2;TM7SF2;ZFP36;EFEMP1;PPP2R1B;HEY1;PLAU;RPS6KA1;ZC3H12A;PIM1;MYBL2;JUNB;SOX4;EDN1;CISH;S100A2;ITGA2;USP2;HUNK;FOS;DUSP6;TUBA4A;DKK3;GREM1;ALDH1A3;PTP4A3;CDCP1;IFI27;COL4A2;IRF1;RBP1;CAT;ANGPTL4;MAPT;EPHA2;FKBP5;CEBPB;PRKAA2;CEBPD;SHMT1;GSTP1;SEMA3A;NDRG2;PRKCZ;FOXO1;SULT1A1;SOCS3;MUC1;UCP2;LRIG1;SNCG;APOE;SLIT2;STAT5A;…
7	Obesity	79/1961	1.24133e-13	1.74282e-10	2.39083	71.0495	LY6K;CD83;CD82;TNC;SLC2A1;CXCL2;HK2;LIPE;ZFP36;C1QTNF1;NAMPT;PDK4;HADH;GLUL;JUNB;PDK2;EDN1;CISH;WNT5B;ACSL1;GPX3;DCXR;CYBA;FOS;DUSP6;IFI27;CAT;CRY2;PLIN4;MMP19;PLIN2;SIK2;ANGPTL4;TRIB1;STX1A;CFD;CEBPB;PFKFB3;PRKAA2;CEBPD;MAOA;NPR1;GSTP1;PRKCZ;ACACB;AGPAT2;FOXO1;ADCY5;AKAP1;EFNB1;SOCS3;DNAJB1;UCP2;SNCG;APOE;SLIT2;STAT5A;NTRK2;JUN;JUND;CDKN2C;VCAM1;FZD4;G0S2;KLF2;NFATC4;PER1;NR4A1;ALDH6A1;NR4A3;FAB…
8	Tumor Progression	81/2090	4.41583e-13	5.42484e-10	2.30006	65.433	CDKN1C;COL18A1;BTG2;CD82;ITGB4;TNC;SLC2A1;TNFAIP2;ARRB1;CXCL1;LAMC2;HK2;CDH6;ZFP36;EFEMP1;PLAU;RPS6KA1;PIM1;MYBL2;JUNB;IER2;SOX4;KDM6B;EDN1;CISH;S100A2;ANXA3;GPX3;ITGA2;FOS;DKK3;GREM1;PTP4A3;CCDC80;CDCP1;GPRC5A;IFI27;IRF1;RBP1;CAT;MMP19;ANG;ANGPTL4;STX1A;EPHA2;LXN;PRKAA2;CEBPD;GSTP1;SEMA3A;NDRG2;RAP1GAP;EFNB1;SOCS3;DNAJB1;MUC1;NUAK2;S100A16;SNCG;SLIT2;STAT5A;NTRK2;JUN;JUND;VCAM1;FZD4;MCAM;TNFSF13…
9	Prostate carcinoma	105/3145	7.37623e-13	8.05484e-10	1.98138	55.3507	CD83;CD82;TNC;MT1X;PLAT;TM7SF2;ZFP36;EFEMP1;PLAU;RPS6KA1;PIM1;JUNB;SOX4;CISH;S100A2;USP2;MAPK8IP2;DKK3;IFI27;PARD3;RBP1;SIK2;TRIB1;EPHA2;FKBP5;LXN;MAOA;NPR1;SHMT1;ERV3-1;NDRG2;PRKCZ;FOXO1;SULT1A1;SOCS3;PDZD2;S100A16;APOE;IGFBP6;STAT5A;JUN;CADM4;JUND;VCAM1;GADD45B;FZD4;MCAM;HSPA6;LIF;TNFRSF10C;MICAL2;TNFRSF10A;NFKBIA;NR4A2;NR4A1;NR4A3;CTRL;FASN;BCL2;CDKN1C;COL18A1;BTG2;FHL1;SLC2A1;CXCL1;LAMC2;HK2;…
10	Rheumatoid Arthritis	74/1833	8.2999e-13	8.15715e-10	2.3959	66.6477	COL18A1;BTG2;TINAGL1;CD83;CD82;FHL1;TNC;TNFAIP2;PLAT;ARRB1;CXCL1;LAMC2;CXCL2;TM7SF2;C4B;ZFP36;PLAU;NAMPT;JUNB;ADAMTS9;EDN1;CISH;ANXA3;ITGA2;ABCC6;FOS;DUSP6;GREM1;ALDH1A3;GPRC5A;IFI27;IRF1;CAT;MMP19;ANG;ANGPTL4;VWA7;FKBP5;CEBPB;PFKFB3;CEBPD;GSTP1;ERV3-1;PRKCZ;FOXO1;EFNB1;SOCS3;HLA-DMA;MUC1;ORMDL3;APOE;STAT5A;JUN;JUND;CDKN2C;GSN;VCAM1;GADD45B;MCAM;TNFSF13;LIF;G0S2;TNFRSF10A;KLF2;NFKBIA;NR4A2;NR4A1;…
11	Colon Carcinoma	80/2091	1.26459e-12	1.12985e-09	2.27058	62.2053	CDKN1C;COL18A1;CD82;ITGB4;FHL1;TNC;SLC2A1;PLAT;CXCL1;LAMC2;CXCL3;CXCL2;HK2;TM7SF2;ZFP36;PPP2R1B;PLAU;RPS6KA1;PDK4;PIM1;JUNB;SOX4;KDM6B;EDN1;CISH;GPX3;CASK;FOS;DKK3;GREM1;PTP4A3;CDCP1;GPRC5A;IFI27;IRF1;CAT;CRY2;ANG;DSG2;SIK2;EPHA2;CEBPB;PFKFB3;PRKAA2;GLS2;SHMT1;GSTP1;NDRG2;PRKCZ;FOXO1;RAP1GAP;SULT1A1;SOCS3;MUC1;UCP2;APOE;IGFBP6;STAT5A;NTRK2;JUN;JUND;GSN;VCAM1;GADD45B;MCAM;LIF;VEGFB;TNFRSF10C;TNFRS…
12	Malignant neoplasm of breast	142/5054	7.06961e-12	5.79001e-09	1.66745	42.8122	LY6K;CD83;CD82;TNC;PLAT;TM7SF2;C4B;LIPE;ZFP36;EFEMP1;PPP2R1B;PLAU;NAMPT;RPS6KA1;ZC3H12A;PIM1;GLUL;JUNB;SOX4;TMOD1;CISH;S100A2;WNT5B;USP2;CYBA;DKK3;IFI27;COL4A2;PARD3;RBP1;ATF5;STX1A;EPHA2;LXN;PFKFB3;MAOA;SHMT1;ERV3-1;NDRG2;PRKCZ;FBLN5;FOXO1;RAP1GAP;SULT1A1;SOCS3;S100A16;HIVEP3;APOE;SLC19A2;STAT5A;JUN;JUND;PTPRN2;VCAM1;JUP;ADHFE1;MCAM;LIF;TNFRSF10A;NFATC4;NFKBIA;NR4A2;FERMT1;NR4A1;NR4A3;BCL6;FASN;…
13	Squamous cell carcinoma	73/1876	7.2518e-12	5.48236e-09	2.30935	59.2343	CDKN1C;COL18A1;LY6K;CD83;CD82;ITGB4;TNC;SLC2A1;MT1X;PLAT;CXCL1;LAMC2;CXCL3;ALDH2;PLAU;RPS6KA1;PIM1;JUNB;SOX4;EDN1;CISH;S100A2;WNT5B;FOS;DKK3;RHOB;GREM1;PTP4A3;CDCP1;GPRC5A;IFI27;PAX8;PARD3;RBP1;CAT;MMP19;DSG2;EPHA2;CEBPB;PRKAA2;CEBPD;SHMT1;GSTP1;MGST1;NDRG2;RAP1GAP;SULT1A1;SOCS3;MUC1;S100A16;LRIG1;SNCG;APOE;SLIT2;STAT5A;JUN;JUND;GSN;VCAM1;JUP;LAMB3;FZD4;TNFSF13;LIF;TNFRSF10A;NFKBIA;FERMT1;NR4A1;F…
14	Malignant neoplasm of pancreas	72/1846	9.41526e-12	6.60951e-09	2.31473	58.768	CDKN1C;COL18A1;CD83;CD82;TNC;SLC2A1;PLAT;HK2;TM7SF2;ZFP36;EFEMP1;ALDH2;PLAU;NAMPT;PIM1;JUNB;SOX4;KDM6B;ENTPD1;S100A2;ABCC6;FOS;DUSP6;DKK3;RHOB;ALDH1A3;CDCP1;IFI27;COL4A2;IRF1;RBP1;CAT;CRY2;ANG;DSG2;STX1A;EPHA2;FKBP5;CEBPB;PRKAA2;GSTP1;CRMP1;NDRG2;PRKCZ;AGPAT2;FOXO1;RAP1GAP;SULT1A1;SOCS3;MUC1;SNCG;HIVEP3;SLIT2;NTRK2;JUN;EGLN3;JUND;GSN;LIF;VEGFB;TNFRSF10C;TNFRSF10A;KLF2;NFKBIA;FERMT1;PER1;NR4A1;BCL…
15	Vascular Diseases	30/401	9.73329e-12	6.37725e-09	4.43994	112.577	MAOA;TNC;FBLN5;TM7SF2;SOCS3;ALDH2;NAMPT;APOE;JUNB;STAT5A;ENTPD1;JUN;EDN1;JUND;AOC2;VCAM1;CISH;ACSL1;MMD;HSPA6;ABCC6;FOS;KLF2;NR4A1;NR4A3;IFI27;NOXA1;CAT;FOSB;PTX3
16	Cardiovascular Diseases	43/787	1.06864e-11	6.56414e-09	3.2426	81.9148	CEBPB;MAOA;NPR1;ITGB4;SHMT1;FHL1;TNC;PLAT;LAMC2;FBLN5;FOXO1;TM7SF2;C4B;LIPE;ALDH2;PLAU;NAMPT;ZC3H12A;UCP2;APOE;SLIT2;GLUL;JUNB;JUN;EDN1;JUND;VCAM1;GPX3;ABCC6;CYBA;FOS;KLF2;NR4A2;COL4A2;CAT;SAA1;FOSB;PTX3;SPRY1;ANGPTL4;MAPT;TRIB1;PNPLA2
17	Glioblastoma	74/1937	1.20828e-11	6.98526e-09	2.26726	56.9973	CDKN1C;COL18A1;BTG2;SYNM;ITGB4;ITSN1;FHL1;TNC;SLC2A1;ARRB1;LAMC2;HK2;TM7SF2;ZFP36;EFEMP1;HEY1;KIF5C;PLAU;NAMPT;PIM1;GLUL;JUNB;SOX4;PSD;KDM6B;EDN1;GPX3;FOS;DUSP6;DKK3;RHOB;IFI27;PARD3;IRF1;MMP19;ITGA7;ANG;ANGPTL4;ATF5;STX1A;EPHA2;CEBPB;PFKFB3;PRKAA2;CEBPD;GLS2;GSTP1;AEBP1;NDRG2;PRKCZ;FOXO1;SULT1A1;EFNB1;SOCS3;RASD1;LRIG1;APOE;RHPN2;SLIT2;STAT5A;JUN;JUND;CDKN2C;GSN;VCAM1;TNFSF13;LIF;TNFRSF10A;NFKBI…
18	Malignant neoplasm of ovary	76/2026	1.43077e-11	7.81201e-09	2.22625	55.59	CDKN1C;COL18A1;CD83;CD82;ITGB4;SLC2A1;PLAT;ARRB1;CXCL1;LAMC2;HK2;TM7SF2;CDH6;EFEMP1;PPP2R1B;ALDH2;PLAU;NAMPT;RPS6KA1;PIM1;EMILIN1;JUNB;EDN1;CISH;ANXA3;ITGA2;CLEC11A;FOS;MAPK8IP2;DUSP6;DKK3;RHOB;PTP4A3;ALDH5A1;CDCP1;IFI27;PAX8;IRF1;RBP1;CAT;MMP19;SIK2;EPHA2;FKBP5;LXN;PRKAA2;SHMT1;GSTP1;ERV3-1;AEBP1;PRKCZ;AGPAT2;FBLN5;FOXO1;MUC1;NUAK2;LRIG1;SNCG;APOE;NTRK2;JUN;JUND;VCAM1;MCAM;LIF;TNFRSF10A;KLF2;NFK…
19	melanoma	86/2454	1.62622e-11	8.41182e-09	2.07981	51.6671	CDKN1C;TINAGL1;CD83;CD82;TNC;SLC2A1;PLAT;ARRB1;CXCL1;LAMC2;CXCL2;HK2;ZFP36;PLAU;NAMPT;PDK4;JUNB;SOX4;KDM6B;ENTPD1;EDN1;CISH;S100A2;GPX3;ITGA2;FOS;DUSP6;DKK3;RHOB;ALDH1A3;PTP4A3;CDCP1;IFI27;COL4A2;IRF1;RBP1;CAT;ANG;DSG2;EPHA2;FKBP5;CEBPB;LXN;PFKFB3;PRKAA2;NPR1;GSTP1;SEMA3A;IL20RB;CRMP1;AEBP1;PRKCZ;FOXO1;RAP1GAP;SOCS3;MUC1;NUAK2;RASD1;UCP2;APOE;NTRK2;JUN;JUND;CDKN2C;GSN;VCAM1;FZD4;MCAM;LIF;TNFRSF10…
20	Myocardial Ischemia	31/448	3.18427e-11	1.56475e-08	4.10661	99.2577	PFKFB3;PRKAA2;CEBPD;NPR1;GSTP1;CXCL2;FOXO1;HK2;SULT1A1;SOCS3;ZFP36;ALDH2;ZC3H12A;PDK4;APOE;JUNB;STAT5A;ENTPD1;EDN1;VCAM1;ABCC6;VEGFB;CYBA;DUSP6;NFKBIA;NR4A1;ALDH6A1;FABP5;IRF1;BCL2;TRIB1
21	Breast Carcinoma	138/4963	3.9797e-11	1.8625e-08	1.65019	39.5176	LY6K;CD83;CD82;TNC;PLAT;TM7SF2;C4B;ZFP36;EFEMP1;PPP2R1B;PLAU;NAMPT;RPS6KA1;ZC3H12A;PIM1;GLUL;JUNB;SOX4;TMOD1;CISH;S100A2;WNT5B;USP2;CYBA;DKK3;IFI27;COL4A2;RBP1;ATF5;STX1A;EPHA2;LXN;PFKFB3;MAOA;SHMT1;ERV3-1;NDRG2;PRKCZ;FBLN5;FOXO1;SULT1A1;SOCS3;S100A16;HIVEP3;APOE;SLC19A2;STAT5A;JUN;JUND;PTPRN2;VCAM1;JUP;MCAM;LIF;TNFRSF10A;NFATC4;NFKBIA;NR4A2;FERMT1;NR4A1;NR4A3;CTRL;BCL6;FASN;BCL2;CDKN1C;SLC48A1;C…
22	Prostatic Neoplasms	62/1554	1.44569e-10	6.4583e-08	2.36778	53.6473	COL18A1;BTG2;CD82;ITGB4;ITSN1;SLC2A1;ZFP36;HEY1;PLAU;PIM1;ADAMTS9;SOX4;TMOD1;KDM6B;EDN1;ANXA3;GPX3;DCXR;ITGA2;USP2;RNASE4;FOS;DKK3;MAPK8IP1;RHOB;CDCP1;PARD3;ITGA7;ANG;EPHA2;FKBP5;CEBPB;CEBPD;MAOA;GSTP1;PRKCZ;FBLN5;FOXO1;SULT1A1;SOCS3;MUC1;PDZD2;RASD1;UCP2;APOE;IGFBP6;SLIT2;STAT5A;JUN;CADM4;JUND;GADD45B;JUP;MCAM;TNFRSF10C;MICAL2;TNFRSF10A;REC8;NR4A1;FABP5;FASN;BCL2
23	Tumor Angiogenesis	32/511	1.9586e-10	8.36917e-08	3.71646	83.0763	COL18A1;SEMA3A;TNC;ARRB1;CXCL1;CXCL2;FBLN5;TM7SF2;EFEMP1;HEY1;PLAU;HIVEP3;IGFBP6;SLIT2;JUNB;ADAMTS9;JUN;EDN1;JUND;FZD4;MCAM;FOS;DKK3;NR4A2;GREM1;PTP4A3;CAT;BCL2;FOSB;ANG;PTX3;ANGPTL4
24	Diabetes	54/1268	2.67557e-10	1.09565e-07	2.5274	55.7082	CDKN1C;DOCK8;SLC2A1;HK2;TM7SF2;ZFP36;EFEMP1;ALDH2;NAMPT;ZC3H12A;PDK4;PIM1;GLUL;ADAMTS9;ENTPD1;EDN1;CISH;ACSL1;CYBA;MAPK8IP1;GREM1;CAT;MAPT;STX1A;FKBP5;PPP1R15B;CEBPB;PRKAA2;MAOA;GSTP1;SEMA3A;ACACB;AGPAT2;FOXO1;ADCY5;SULT1A1;SOCS3;HLA-DMA;RASD1;UCP2;APOE;SLC19A2;STAT5A;PTPRN2;AOC2;VCAM1;LIF;KLF2;NFATC4;PER1;NR4A3;PC;FASN;PNPLA2
25	Ovarian Carcinoma	77/2203	2.98986e-10	1.17537e-07	2.07432	45.4912	CDKN1C;COL18A1;CD82;ITGB4;SLC2A1;PLAT;ARRB1;CXCL1;LAMC2;HK2;TM7SF2;CDH6;EFEMP1;PPP2R1B;ALDH2;PLAU;NAMPT;RPS6KA1;PIM1;EMILIN1;JUNB;EDN1;ANXA3;ITGA2;CLEC11A;FOS;MAPK8IP2;DUSP6;DKK3;RHOB;PTP4A3;CCDC80;ALDH5A1;CDCP1;IFI27;PAX8;IRF1;RBP1;CAT;MMP19;SIK2;ANGPTL4;MAPT;EPHA2;FKBP5;PRKAA2;SHMT1;GSTP1;ERV3-1;AEBP1;AGPAT2;FBLN5;FOXO1;MUC1;NUAK2;LRIG1;SNCG;APOE;STAT5A;NTRK2;JUN;JUND;VCAM1;MCAM;LIF;VEGFB;TNFRS…
26	Pancreatic carcinoma	69/1869	3.19144e-10	1.20636e-07	2.19099	47.9068	CDKN1C;COL18A1;CD82;TNC;SLC2A1;PLAT;HK2;TM7SF2;ZFP36;ZNF608;EFEMP1;ALDH2;PLAU;NAMPT;PIM1;JUNB;SOX4;KDM6B;ENTPD1;S100A2;ABCC6;FOS;DUSP6;DKK3;RHOB;ALDH1A3;CDCP1;IFI27;COL4A2;IRF1;RBP1;CAT;CRY2;ANG;DSG2;EPHA2;FKBP5;CEBPB;GSTP1;CRMP1;NDRG2;AGPAT2;FOXO1;RAP1GAP;SULT1A1;SOCS3;MUC1;SNCG;HIVEP3;SLIT2;NTRK2;JUN;EGLN3;JUND;GSN;LIF;TNFRSF10C;TNFRSF10A;KLF2;NFKBIA;FERMT1;PER1;NR4A1;BCL6;BCL2;SPAG1;FOSB;PTX3;…
27	Diabetes Mellitus, Non-Insulin-Dependent	64/1672	3.79334e-10	1.38077e-07	2.27166	49.2783	CDKN1C;SLC2A1;PLAT;HK2;C4B;LIPE;ZFP36;C1QTNF1;ALDH2;NAMPT;PDK4;HADH;GLUL;ADAMTS9;PDK2;ENTPD1;EDN1;CISH;WNT5B;ACSL1;ITGA2;USP2;CYBA;DUSP6;MAPK8IP1;GREM1;CAT;CRY2;SIK2;ANGPTL4;STX1A;FKBP5;CFD;CEBPB;PRKAA2;MAOA;NPR1;GSTP1;PRKCZ;ACACB;FOXO1;ADCY5;SULT1A1;SOCS3;HLA-DMA;RASD1;UCP2;APOE;SLC19A2;STAT5A;PTPRN2;AOC2;VCAM1;ANKRD23;LIF;G0S2;PER1;ALDH6A1;NR4A3;PC;FABP5;FASN;BCL2;PNPLA2
28	Liver carcinoma	107/3593	4.87866e-10	1.71241e-07	1.76737	37.8941	CD82;MT1X;PLAT;TM7SF2;C4B;LIPE;ZFP36;EFEMP1;PPP2R1B;PLAU;ZC3H12A;PDK4;PIM1;GLUL;JUNB;SOX4;CISH;ACSL1;USP2;DKK3;IFI27;PARD3;RBP1;ATF5;EPHA2;PFKFB3;MAOA;SHMT1;NDRG2;FBLN5;FOXO1;SULT1A1;EFNB1;SOCS3;APOE;STAT5A;JUN;JUND;VCAM1;GADD45B;MCAM;TNFSF13;LIF;TNFRSF10C;TNFRSF10A;NFKBIA;NR4A2;FERMT1;NR4A1;NR4A3;FASN;BCL2;CDKN1C;COL18A1;BTG2;SYNM;TINAGL1;ITGB4;SLC2A1;ARRB1;CXCL1;LAMC2;DNALI1;HK2;ALDH2;MYBL2;KDM…
29	Malignant neoplasm of lung	82/2449	5.37792e-10	1.82256e-07	1.98712	42.4123	CDKN1C;COL18A1;BTG2;CD82;DOCK8;FAM13A;TNC;SLC2A1;PLAT;ARRB1;CXCL1;LAMC2;HK2;TM7SF2;ZFP36;EFEMP1;PPP2R1B;HEY1;ALDH2;RASSF4;PLAU;RPS6KA1;PIM1;JUNB;IER2;SOX4;ENTPD1;EDN1;S100A2;GPX3;ITGA2;SPNS2;FOS;DUSP6;ALDH1A3;CDCP1;GPRC5A;IFI27;COL4A2;IRF1;CAT;ADSSL1;MMP19;ITGA7;EPHA2;CEBPB;PFKFB3;PRKAA2;SHMT1;GSTP1;CRMP1;PRKCZ;FBLN5;FOXO1;SULT1A1;SOCS3;MUC1;ABI3BP;UCP2;LRIG1;SNCG;APOE;IGFBP6;SLIT2;STAT5A;NTRK2;J…
30	Malignant tumor of colon	71/2001	9.39484e-10	3.07775e-07	2.10577	43.7699	CDKN1C;COL18A1;CD82;ITGB4;FHL1;TNC;SLC2A1;PLAT;CXCL1;HK2;TM7SF2;ZFP36;PPP2R1B;PLAU;RPS6KA1;PDK4;JUNB;KDM6B;EDN1;CISH;GPX3;FOS;DKK3;GREM1;PTP4A3;CDCP1;GPRC5A;IFI27;IRF1;CRY2;ITGA7;ANG;DSG2;SIK2;EPHA2;CEBPB;PRKAA2;GLS2;SHMT1;GSTP1;NDRG2;FOXO1;RAP1GAP;SULT1A1;SOCS3;MUC1;UCP2;APOE;IGFBP6;STAT5A;NTRK2;JUN;EGLN3;JUND;GSN;VCAM1;GADD45B;MCAM;VEGFB;TNFRSF10C;TNFRSF10A;NFKBIA;NR4A2;FERMT1;PER1;NR4A1;FASN;N…
31	Adenocarcinoma	63/1712	2.55064e-09	8.08635e-07	2.18392	43.2131	CDKN1C;COL18A1;CD83;CD82;ITGB4;TNC;SLC2A1;PLAT;LAMC2;EFEMP1;HEY1;ALDH2;PLAU;RPS6KA1;PIM1;SOX4;S100A2;GPX3;ITGA2;ABCC6;HUNK;FOS;DUSP6;DKK3;GREM1;ALDH1A3;PTP4A3;CDCP1;GPRC5A;IFI27;PAX8;IRF1;RBP1;CAT;MMP19;ANG;EPHA2;PFKFB3;SHMT1;GSTP1;CRMP1;PRKCZ;EFNB1;SOCS3;MUC1;APOE;SLIT2;STAT5A;NTRK2;JUN;GSN;VCAM1;MCAM;TNFSF13;TNFRSF10C;LAYN;TNFRSF10A;NFKBIA;NR4A2;FASN;NOXA1;BCL2;OCIAD2
32	Endometrial Carcinoma	40/840	3.34382e-09	1.02697e-06	2.82606	55.1537	CDKN1C;LXN;CD82;GSTP1;ERV3-1;PLAT;ARRB1;CXCL1;CXCL2;AGPAT2;FOXO1;RAP1GAP;SULT1A1;SOCS3;EFEMP1;PLAU;SNCG;MYBL2;APOE;IGFBP6;SOX4;NTRK2;ENTPD1;EDN1;VEGFB;TNFRSF10C;FOS;DUSP6;DKK3;PER1;GPRC5A;IFI27;PAX8;FASN;RBP1;CAT;BCL2;ANG;MUC20;EPHA2
33	Perihilar Cholangiocarcinoma	6/10	4.34323e-09	1.29349e-06	35.6083	685.625	JUN;JUND;SLC2A1;FOSB;FOS;JUNB
34	Adenoma	44/1000	5.66345e-09	1.63707e-06	2.61128	49.5861	CDKN1C;COL18A1;SYNM;CEBPB;CD82;SHMT1;GSTP1;FHL1;TNC;SLC2A1;ARRB1;CXCL1;NDRG2;RAP1GAP;SULT1A1;ZFP36;MUC1;EFEMP1;ALDH2;PLAU;LRIG1;APOE;SLIT2;GLUL;EDN1;CDKN2C;GSN;ANXA3;ADHFE1;TNFSF13;LIF;VEGFB;TNFRSF10A;FOS;DUSP6;DKK3;NR4A2;GREM1;IFI27;PAX8;PARD3;FASN;BCL2;STX1A
35	Diabetes Mellitus	57/1507	6.42566e-09	1.80433e-06	2.24472	42.342	CDKN1C;DOCK8;SLC2A1;HK2;TM7SF2;ZFP36;EFEMP1;ALDH2;NAMPT;ZC3H12A;PDK4;PIM1;GLUL;ADAMTS9;ENTPD1;EDN1;CISH;ACSL1;GPX3;CYBA;FOS;MAPK8IP1;GREM1;CAT;MAPT;STX1A;FKBP5;PPP1R15B;CEBPB;PRKAA2;MAOA;GSTP1;SEMA3A;ACACB;AGPAT2;FOXO1;ADCY5;SULT1A1;SOCS3;HLA-DMA;RASD1;UCP2;APOE;SLC19A2;STAT5A;PTPRN2;AOC2;VCAM1;LIF;KLF2;NFATC4;PER1;NR4A3;PC;FASN;BCL2;PNPLA2
36	Renal Cell Carcinoma	53/1348	6.51503e-09	1.7786e-06	2.33338	43.9823	COL18A1;CD82;TNC;SLC2A1;HK2;TM7SF2;CDH6;HEY1;PLAU;ZC3H12A;KDM6B;EDN1;CISH;GPX3;DKK3;CDCP1;IFI27;PAX8;PARD3;IRF1;RBP1;PLIN2;ANG;ANGPTL4;EPHA2;SPTBN4;CEBPB;PRKAA2;CEBPD;GSTP1;NDRG2;PRKCZ;FOXO1;RAP1GAP;SOCS3;DNAJB1;MUC1;PDZD2;LRIG1;HIVEP3;APOE;IGFBP6;SLIT2;JUN;EGLN3;VCAM1;JUP;SPAG4;LIF;VEGFB;TNFRSF10A;NR4A1;BCL2
37	Arteriosclerosis	46/1087	8.19289e-09	2.17621e-06	2.51147	46.7636	CDKN1C;PRKAA2;MAOA;ITGB4;TNC;PLAT;CXCL1;FOXO1;TM7SF2;LIPE;EFNB1;SOCS3;ZFP36;ALDH2;PLAU;NAMPT;ORMDL3;UCP2;PDK4;APOE;SLIT2;ENTPD1;EDN1;AOC2;VCAM1;JUP;ACSL1;TNFSF13;CYBA;FOS;KLF2;GREM1;NR4A1;NR4A3;IFI27;FABP5;IRF1;NOXA1;CAT;SAA1;BCL2;ITGA7;PTX3;ANGPTL4;EPHA2;PNPLA2
38	Liver neoplasms	52/1321	8.9005e-09	2.30195e-06	2.33615	43.3056	CDKN1C;COL18A1;SLC2A1;PLAT;HK2;TM7SF2;C4B;LIPE;HEBP2;ALDH2;PLAU;ZC3H12A;PDK4;GLUL;JUNB;KDM6B;ACSL1;GPX3;FOS;DUSP6;DKK3;IFI27;PAX8;IRF1;RBP1;CAT;ITGA7;ANGPTL4;ATF5;EPHA2;CEBPB;GLS2;ERV3-1;NDRG2;FOXO1;SULT1A1;SOCS3;DNAJB1;MUC1;SNCG;APOE;STAT5A;JUN;EGLN3;JUND;LIF;FAH;TTC39A;FASN;BCL2;FOSB;PNPLA2
39	Arthritis	33/630	9.04861e-09	2.28025e-06	3.10866	57.5745	COL18A1;CEBPB;TNC;ARRB1;CXCL1;CXCL2;FOXO1;TM7SF2;C4B;SOCS3;ZFP36;MUC1;NAMPT;JUNB;ENTPD1;JUN;EGLN3;JUND;VCAM1;GADD45B;MCAM;DCXR;ITGA2;LIF;FOS;NR4A2;PARD3;SAA1;BCL2;FOSB;ANG;PTX3;ANGPTL4
40	Malignant neoplasm of liver	38/805	1.07989e-08	2.65329e-06	2.80148	51.3899	COL18A1;CEBPB;CD83;PRKAA2;CD82;CEBPD;GSTP1;SLC2A1;ARRB1;NDRG2;HK2;HEBP2;DNAJB1;ZFP36;MUC1;ALDH2;PLAU;PDK4;PIM1;SNCG;GLUL;JUN;EGLN3;GADD45B;ANXA3;GPX3;TNFSF13;TNFRSF10A;FAH;TTC39A;NFKBIA;NR4A1;IFI27;FASN;IRF1;BCL2;FOSB;FRK
41	Myocardial Infarction	42/966	1.8335e-08	4.39503e-06	2.58031	45.9669	CDKN1C;SPTBN4;NPR1;GSTP1;TNC;PLAT;LAMC2;FOXO1;TM7SF2;C4B;SOCS3;PDZD2;ALDH2;PLAU;NAMPT;ZC3H12A;UCP2;APOE;HADH;NTRK2;ENTPD1;EDN1;EGLN3;PTPRN2;GSN;VCAM1;ITGA2;TNFSF13;LIF;VEGFB;CYBA;NFKBIA;CDCP1;PC;COL4A2;CAT;BCL2;ANG;PTX3;ANGPTL4;MAPT;TRIB1
42	Hyperglycemia	28/488	1.8843e-08	4.40926e-06	3.40517	60.5681	SLC2A1;CRMP1;ARRB1;PRKCZ;FOXO1;HK2;ADCY5;LIPE;SOCS3;HLA-DMA;ALDH2;NAMPT;UCP2;PDK4;APOE;JUNB;JUN;EDN1;JUND;VCAM1;CYBA;FOS;KLF2;NFKBIA;FASN;CAT;BCL2;FOSB
43	ovarian neoplasm	41/938	2.37833e-08	5.43587e-06	2.59407	45.537	CDKN1C;COL18A1;CD82;SHMT1;GSTP1;TNC;SLC2A1;PLAT;CXCL1;LAMC2;AGPAT2;FBLN5;FOXO1;SULT1A1;MUC1;EFEMP1;PLAU;SNCG;APOE;STAT5A;NTRK2;JUN;EDN1;VCAM1;ANXA3;MCAM;LIF;TNFRSF10C;TNFRSF10A;DUSP6;KLF2;RHOB;PTP4A3;CDCP1;IFI27;PAX8;COL4A2;FASN;RBP1;BCL2;EPHA2
44	Cervix carcinoma	45/1105	3.79237e-08	8.47078e-06	2.41685	41.2984	CD83;CD82;CEBPD;SLC2A1;TNFAIP2;PLAT;NDRG2;ACACB;FOXO1;HK2;SULT1A1;SOCS3;ZFP36;MUC1;EFEMP1;PPP2R1B;PLAU;MYBL2;SLIT2;JUNB;SOX4;STAT5A;JUN;EDN1;JUND;GSN;CISH;LAMB3;FZD4;VEGFB;TNFRSF10C;CYBA;FOS;MAPK8IP2;DKK3;NFKBIA;NR4A2;IFI27;PAX8;FABP5;IRF1;CAT;BCL2;FOSB;EPHA2
45	Secondary malignant neoplasm of lymph node	49/1271	4.86517e-08	1.06255e-05	2.28797	38.5262	CDKN1C;COL18A1;SYNM;CD82;ITGB4;FHL1;TNC;SLC2A1;MT1X;CDH6;EFEMP1;PLAU;PIM1;ADAMTS9;PSD;TMOD1;S100A2;ANXA3;GPX3;ITGA2;FOS;DKK3;PTP4A3;IFI27;PARD3;ANG;ANGPTL4;EPHA2;PFKFB3;GSTP1;CRMP1;NDRG2;SULT1A1;SOCS3;MUC1;SNCG;APOE;SLIT2;NTRK2;JUN;GSN;VCAM1;VEGFB;NR4A2;PER1;NR4A1;FABP5;BCL2;OCIAD2
46	Degenerative polyarthritis	41/976	7.07331e-08	1.51123e-05	2.49307	41.0468	CEBPB;CD82;SEMA3A;TNC;SLC2A1;CXCL1;PRKCZ;CXCL2;C4B;SOCS3;ZFP36;PLAU;NAMPT;ZC3H12A;APOE;JUNB;ADAMTS9;JUN;EDN1;JUND;VCAM1;GADD45B;CISH;FZD4;MCAM;ITGA2;TNFSF13;LIF;CYBA;FOS;DKK3;NFATC4;RHOB;GREM1;IRF1;SAA1;BCL2;FOSB;ANG;PTX3;ANGPTL4
47	Atherosclerosis	45/1134	8.05399e-08	1.68414e-05	2.35505	38.4685	CDKN1C;PRKAA2;MAOA;ITGB4;TNC;PLAT;CXCL1;FOXO1;TM7SF2;LIPE;EFNB1;SOCS3;ZFP36;ALDH2;PLAU;NAMPT;ORMDL3;UCP2;PDK4;APOE;SLIT2;ENTPD1;EDN1;AOC2;VCAM1;JUP;ACSL1;TNFSF13;CYBA;FOS;KLF2;GREM1;NR4A1;NR4A3;IFI27;FABP5;IRF1;NOXA1;CAT;SAA1;BCL2;PTX3;ANGPTL4;EPHA2;PNPLA2
48	Non-Small Cell Lung Carcinoma	71/2243	1.04405e-07	2.13769e-05	1.87858	30.1981	CDKN1C;COL18A1;LY6K;TINAGL1;CD83;CD82;ITGB4;TNC;SLC2A1;MT1X;ARRB1;CXCL1;LAMC2;HK2;TM7SF2;EFEMP1;RASSF4;PLAU;NAMPT;RPS6KA1;PIM1;MYBL2;JUNB;SOX4;KDM6B;S100A2;MMD;ITGA2;SPNS2;FOS;DUSP6;TUBA4A;DKK3;ALDH1A3;GPRC5A;IFI27;PAX8;IRF1;RBP1;CAT;MMP19;DSG2;EPHA2;PRKAA2;GSTP1;IL20RB;CRMP1;FOXO1;SOCS3;DNAJB1;MUC1;UCP2;IGFBP6;STAT5A;NTRK2;JUN;EGLN3;JUND;CDKN2C;GSN;VCAM1;VEGFB;G0S2;KLF2;NFKBIA;PER1;TSPAN14;NR4A3…
49	Dermatologic disorders	24/406	1.16731e-07	2.3413e-05	3.50821	56.0029	JUN;JUND;CD83;PFKFB3;VCAM1;GADD45B;LAMB3;ITGB4;MCAM;ABCC6;TNC;CXCL1;LAMC2;FOS;CXCL3;CXCL2;NR4A2;FERMT1;COL7A1;BCL2;FOSB;PTX3;JUNB;SLC19A2
50	Colorectal Neoplasms	43/1073	1.23215e-07	2.42192e-05	2.37831	37.8374	CD82;NPR1;GSTP1;FHL1;TNC;SLC2A1;LAMC2;SULT1A1;MUC1;EFEMP1;PPP2R1B;ALDH2;PLAU;SH3TC1;NAMPT;LRIG1;SNCG;MYBL2;APOE;RHPN2;SLIT2;SOX4;NTRK2;PPP1R14A;EDN1;GSN;LAMB3;TNFSF13;ABCC6;TNFRSF10A;FOS;DKK3;NFKBIA;NR4A2;GREM1;PER1;PTP4A3;PAX8;COL7A1;BCL2;ANG;SIK2;EPHA2
51	Adenocarcinoma of colon	19/267	1.50215e-07	2.89474e-05	4.22321	66.3516	JUN;EGLN3;JUND;GSN;PFKFB3;GLS2;ITGA2;SLC2A1;FOS;NDRG2;FOXO1;ZFP36;PPP2R1B;PLAU;BCL2;FOSB;ANG;ANGPTL4;JUNB
52	Colorectal Cancer	93/3298	1.59891e-07	3.02194e-05	1.67353	26.1886	CDKN1C;COL18A1;CD82;ITGB4;TNC;SLC2A1;PLAT;CXCL1;LAMC2;DNALI1;LIPE;EFEMP1;PPP2R1B;ALDH2;PLAU;NAMPT;PIM1;JUNB;ADAMTS9;SOX4;PSD;KDM6B;EDN1;CISH;GPX3;ABCC6;CASK;FOS;SDCBP2;DKK3;RHOB;GREM1;PTP4A3;CDCP1;GPRC5A;IFI27;PAX8;IRF1;CRY2;ANG;SIK2;TRIB1;EPHA2;CEBPB;PFKFB3;PRKAA2;CEBPD;SHMT1;GSTP1;AKAP6;NDRG2;PRKCZ;SULT1A1;FAM83H;EFNB1;SOCS3;MUC1;SH3TC1;UCP2;LRIG1;SNCG;HIVEP3;APOE;RHPN2;SLIT2;STAT5A;NTRK2;PPP1R…
53	Colorectal Carcinoma	85/2931	2.02811e-07	3.7608e-05	1.72109	26.5237	CDKN1C;COL18A1;CD82;ITGB4;TNC;SLC2A1;CXCL1;LAMC2;LIPE;ZFP36;EFEMP1;PPP2R1B;ALDH2;PLAU;NAMPT;PIM1;JUNB;ADAMTS9;SOX4;PSD;KDM6B;EDN1;CISH;GPX3;ABCC6;CASK;FOS;DKK3;RHOB;GREM1;PTP4A3;CDCP1;GPRC5A;IFI27;PAX8;IRF1;CRY2;ANG;SIK2;TRIB1;EPHA2;CEBPB;PFKFB3;PRKAA2;CEBPD;SHMT1;GSTP1;NDRG2;RAP1GAP;SULT1A1;FAM83H;EFNB1;SOCS3;MUC1;SH3TC1;LRIG1;SNCG;APOE;RHPN2;SLIT2;STAT5A;NTRK2;PPP1R14A;JUN;EGLN3;JUND;GSN;VCAM1;…
54	Malignant neoplasm of stomach	73/2398	3.08058e-07	5.60666e-05	1.80665	27.087	COL18A1;LY6K;CD82;ITGB4;FHL1;SLC2A1;TNFAIP2;PLAT;CXCL1;LAMC2;TM7SF2;ALDH2;PLAU;ZC3H12A;PIM1;GLUL;JUNB;ADAMTS9;SOX4;CISH;S100A2;GPX3;ITGA2;FOS;MAPK8IP2;DKK3;RHOB;GREM1;ALDH1A3;PTP4A3;GPRC5A;IFI27;IRF1;RBP1;CAT;PLIN2;ANG;DSG2;MAPT;EPHA2;FKBP5;CEBPB;LXN;PRKAA2;GSTP1;NDRG2;FOXO1;SULT1A1;EFNB1;SOCS3;MUC1;SNCG;APOE;IGFBP6;STAT5A;NTRK2;JUN;EGLN3;JUND;GSN;VCAM1;LAMB3;MCAM;TNFSF13;MICAL2;TNFRSF10A;KLF2;NF…
55	Inflammation	24/429	3.20351e-07	5.72438e-05	3.32012	49.6486	EDN1;CD83;VCAM1;TNFSF13;LIF;VEGFB;PLAT;CXCL1;CXCL2;KLF2;C4B;EFNB1;SOCS3;ZFP36;MUC1;PLAU;IRF1;NAMPT;CAT;SAA1;ANG;DSG2;PTX3;SLC28A3
56	Primary malignant neoplasm of lung	70/2268	3.45136e-07	6.05714e-05	1.8317	27.2545	CDKN1C;COL18A1;BTG2;CD82;DOCK8;FAM13A;TNC;SLC2A1;PLAT;ARRB1;CXCL1;LAMC2;HK2;TM7SF2;ZFP36;EFEMP1;HEY1;ALDH2;RASSF4;PLAU;RPS6KA1;PIM1;SOX4;ENTPD1;EDN1;S100A2;ITGA2;SPNS2;DUSP6;ALDH1A3;CDCP1;GPRC5A;COL4A2;CAT;ADSSL1;MMP19;ITGA7;EPHA2;CEBPB;PRKAA2;SHMT1;GSTP1;CRMP1;PRKCZ;FBLN5;FOXO1;SULT1A1;SOCS3;MUC1;ABI3BP;UCP2;LRIG1;SNCG;APOE;IGFBP6;SLIT2;NTRK2;JUN;EGLN3;GSN;GADD45B;G0S2;TNFRSF10A;NFKBIA;NR4A2;FER…
57	Pancreatic Neoplasm	31/665	3.48835e-07	6.01465e-05	2.76656	41.1351	CDKN1C;COL18A1;PFKFB3;GSTP1;SEMA3A;SLC2A1;PLAT;NDRG2;PRKCZ;FOXO1;RAP1GAP;HK2;MUC1;EFEMP1;ALDH2;PLAU;APOE;SLIT2;IER2;JUN;GSN;ITGA2;VEGFB;DUSP6;DKK3;NFKBIA;PER1;NR4A1;GPRC5A;BCL2;ANGPTL4
58	Astrocytoma	33/741	4.04105e-07	6.84749e-05	2.64299	38.909	COL18A1;PFKFB3;GSTP1;TNC;SLC2A1;PLAT;CXCL1;NDRG2;TM7SF2;EFNB1;MUC1;HEY1;PLAU;PIM1;APOE;SOX4;NTRK2;EDN1;EGLN3;TLE2;GSN;VCAM1;WNT5B;VEGFB;TNFRSF10A;DKK3;IFI27;FABP5;CAT;BCL2;MMP19;STX1A;EPHA2
59	Noninfiltrating Intraductal Carcinoma	19/287	4.57844e-07	7.62659e-05	3.92891	57.3492	STAT5A;GSN;CD82;CISH;GSTP1;TNC;SLC2A1;DUSP6;PTP4A3;MUC1;ALDH5A1;BCL6;PLAU;FASN;IRF1;RBP1;BCL2;SNCG;SLIT2
60	Squamous cell carcinoma of the head and neck	38/934	4.92417e-07	8.06579e-05	2.41455	35.0688	CDKN1C;COL18A1;LY6K;CEBPB;ITGB4;SHMT1;GSTP1;SEMA3A;TNC;SLC2A1;TNFAIP2;RAP1GAP;SULT1A1;SOCS3;ZFP36;MUC1;ALDH2;NAMPT;JUNB;SOX4;STAT5A;KDM6B;JUN;EGLN3;JUND;S100A2;ITGA2;TNFRSF10A;FOS;DKK3;NR4A2;PER1;IFI27;CAT;BCL2;FOSB;PTX3;EPHA2
61	Endometriosis	33/749	5.13993e-07	8.28119e-05	2.61476	37.8645	CFD;COL18A1;CD82;MAOA;GSTP1;TNC;SLC2A1;CRMP1;CXCL1;FOXO1;MUC1;HEY1;PLAU;ABI3BP;SNCG;APOE;IGFBP6;NTRK2;JUN;VCAM1;GPX3;ITGA2;FOS;NFKBIA;GREM1;NR4A1;IFI27;PAX8;RBP1;CAT;BCL2;ANG;FKBP5
62	Oral mucosal blisters	5/11	5.60526e-07	8.88525e-05	26.976	388.303	JUP;LAMB3;ITGB4;COL7A1;LAMC2
63	Invasive carcinoma of breast	22/385	7.04856e-07	0.000109957	3.39127	48.0382	KDM6B;COL18A1;JUN;BTG2;GSN;GSTP1;TNC;SLC2A1;PRKCZ;ZFP36;PTP4A3;MUC1;IFI27;BCL6;PLAU;PARD3;FASN;IRF1;BCL2;SNCG;SLIT2;EPHA2
64	Liver Cirrhosis, Experimental	34/801	7.98821e-07	0.000122669	2.51911	35.3686	CFD;OTUB2;CD83;CEBPD;FAM89A;GLS2;FHL1;PLAT;CXCL1;NDRG2;HLA-DMA;ALDH2;RASSF4;PLAU;SOX4;SAMD11;SLC19A2;EDN1;GSN;ACSL1;ANXA3;ADHFE1;DCXR;LAPTM5;G0S2;RNASE4;CYBA;FOS;DUSP6;NFKBIA;PC;GPAM;COL4A2;PLIN2
65	Carcinoma	16/216	8.57053e-07	0.000129586	4.39609	61.4123	STAT5A;ACSL1;GSTP1;SLC2A1;G0S2;CASK;DUSP6;ADCY5;GREM1;MUC1;EFEMP1;RBP1;UCP2;BCL2;SNCG;ANGPTL4
66	Classical Hodgkin's Lymphoma	14/166	8.92529e-07	0.000132906	5.00518	69.7182	STAT5A;JUN;JUND;CEBPD;FOS;FOXO1;NFKBIA;SOCS3;MUC1;BCL6;HEY1;FOSB;ATF5;JUNB
67	Stomach Carcinoma	71/2378	9.67777e-07	0.00014196	1.77193	24.5382	COL18A1;LY6K;CD82;ITGB4;FHL1;SLC2A1;TNFAIP2;PLAT;CXCL1;LAMC2;TM7SF2;ALDH2;PLAU;ZC3H12A;PIM1;GLUL;JUNB;ADAMTS9;SOX4;PSD;CISH;S100A2;GPX3;ITGA2;CASK;FOS;MAPK8IP2;DKK3;PTP4A3;CDCP1;GPRC5A;IFI27;IRF1;RBP1;CAT;ANG;DSG2;MAPT;EPHA2;FKBP5;CEBPB;LXN;PRKAA2;GSTP1;NDRG2;FOXO1;SULT1A1;EFNB1;SOCS3;MUC1;SNCG;APOE;IGFBP6;STAT5A;NTRK2;JUN;EGLN3;JUND;GSN;VCAM1;LAMB3;MCAM;TNFSF13;TNFRSF10A;KLF2;NFKBIA;NR4A2;NR4A1;…
68	Lung diseases	22/393	9.9338e-07	0.000143573	3.32223	45.9204	JUN;EDN1;JUND;GSN;GPX3;MCAM;GSTP1;FAM13A;SLC2A1;CXCL1;FOS;CXCL2;KLF2;NFKBIA;GREM1;GPRC5A;ALDH2;IRF1;CAT;BCL2;FOSB;JUNB
69	Carcinoma of lung	73/2476	1.04791e-06	0.000149259	1.74974	24.0916	CDKN1C;COL18A1;BTG2;CD82;DOCK8;FAM13A;TNC;SLC2A1;PLAT;ARRB1;CXCL1;LAMC2;HK2;TM7SF2;ZFP36;EFEMP1;PPP2R1B;HEY1;ALDH2;RASSF4;PLAU;RPS6KA1;PIM1;SOX4;ENTPD1;EDN1;S100A2;ITGA2;SPNS2;DUSP6;ALDH1A3;CDCP1;GPRC5A;IFI27;COL4A2;CAT;ADSSL1;MMP19;ITGA7;EPHA2;CEBPB;PRKAA2;SHMT1;GSTP1;CRMP1;PRKCZ;FBLN5;FOXO1;SULT1A1;SOCS3;MUC1;ABI3BP;UCP2;LRIG1;SNCG;APOE;IGFBP6;SLIT2;NTRK2;JUN;EGLN3;GSN;GADD45B;G0S2;TNFRSF10A;NF…
70	Conventional (Clear Cell) Renal Cell Carcinoma	29/631	1.12845e-06	0.000158435	2.72752	37.3525	SPTBN4;COL18A1;BTG2;CEBPB;CD82;GSTP1;SLC2A1;NDRG2;PRKCZ;FOXO1;RAP1GAP;SOCS3;MUC1;PDZD2;EDN1;CADM4;VCAM1;GPX3;MCAM;SPAG4;DKK3;GREM1;CDCP1;PAX8;RBP1;BCL2;PLIN2;ANGPTL4;EPHA2
71	Epithelial ovarian cancer	47/1329	1.12867e-06	0.000156233	2.09881	28.7421	CDKN1C;COL18A1;CD82;SHMT1;GSTP1;TNC;ARRB1;CXCL1;FBLN5;FOXO1;HK2;MUC1;EFEMP1;ALDH2;PLAU;NAMPT;SNCG;STAT5A;JUN;EDN1;GSN;VCAM1;CISH;TNFRSF10C;FOS;DKK3;NFKBIA;PTP4A3;ALDH5A1;CDCP1;IFI27;PAX8;COL4A2;BCL6;FASN;VEPH1;IRF1;CAT;BCL2;FOSB;ANG;SPRY1;ANGPTL4;MAPT;MUC20;EPHA2;PNPLA2
72	Pneumonia	25/497	1.28737e-06	0.000175726	2.98527	40.489	GSTP1;DOCK8;PLAT;CXCL1;LAMC2;CXCL2;SOCS3;PLAU;NAMPT;ZC3H12A;APOE;JUNB;ENTPD1;JUN;JUND;AOC2;VCAM1;MCAM;FOS;KLF2;NFKBIA;GPRC5A;FABP5;BCL2;FOSB
73	Bladder Neoplasm	44/1217	1.44982e-06	0.000195189	2.14567	28.8465	CDKN1C;COL18A1;LY6K;BTG2;PRKAA2;CD82;GSTP1;SLC2A1;CXCL1;LAMC2;NDRG2;FBLN5;FOXO1;SULT1A1;MUC1;ALDH2;PLAU;NAMPT;LRIG1;SNCG;JUNB;SOX4;CMTM8;JUN;EDN1;JUND;GSN;JUP;CISH;FZD4;TNFRSF10A;FOS;DKK3;NR4A2;FERMT1;ALDH1A3;GPRC5A;IFI27;IRF1;RBP1;BCL2;FOSB;PLIN2;EPHA2
74	Malignant Neoplasms	49/1438	1.872e-06	0.000248622	2.02226	26.6706	CDKN1C;CD82;ITGB4;DOCK8;TNC;SLC2A1;LAMC2;HEBP2;ZFP36;ALDH2;NAMPT;PIM1;MYBL2;SOX4;KDM6B;CISH;GPX3;ITGA2;FOS;DKK3;GREM1;ALDH1A3;PTP4A3;PAX8;PARD3;CAT;ANG;ANGPTL4;ATF5;TRIB1;EPHA2;FKBP5;DCUN1D3;NDRG2;SOCS3;MUC1;SLIT2;STAT5A;NTRK2;EGLN3;CDKN2C;GSN;TNFRSF10A;NR4A3;BCL6;FASN;VEPH1;BCL2;PTX3
75	Thyroid Neoplasm	24/476	2.02487e-06	0.000265338	2.99229	39.229	CDKN1C;COL18A1;JUN;CEBPB;CDKN2C;JUP;CD82;ITGB4;GPX3;GSTP1;SLC2A1;FOS;NDRG2;FOXO1;RAP1GAP;RHOB;CDH6;MUC1;IFI27;PAX8;PLAU;ABI3BP;UCP2;BCL2
76	Uterine Corpus Cancer	27/579	2.04061e-06	0.000263883	2.76749	36.2603	LXN;CD82;GSTP1;PLAT;ARRB1;CXCL1;CXCL2;AGPAT2;FOXO1;RAP1GAP;SULT1A1;PLAU;SNCG;IGFBP6;SOX4;ENTPD1;EDN1;VEGFB;FOS;DUSP6;DKK3;PER1;PAX8;RBP1;BCL2;MUC20;EPHA2
77	Anoxia	18/288	2.09934e-06	0.000267952	3.7092	48.4937	ENTPD1;JUN;EDN1;EGLN3;PFKFB3;VCAM1;PRKAA2;TNC;SLC2A1;PLAT;FOS;MUC1;FASN;UCP2;BCL2;PLIN2;ANG;APOE
78	Tumor Promotion	11/108	2.12554e-06	0.000267818	6.04462	78.9517	STAT5A;ZFP36;JUN;JUND;S100A2;IFI27;BCL2;SLC2A1;FOSB;FOS;JUNB
79	Congestive heart failure	35/884	2.64886e-06	0.000329532	2.34972	30.1736	CFD;NPR1;TNC;SLC2A1;CRMP1;PLAT;ARRB1;CXCL2;FBLN5;HK2;TM7SF2;ALDH2;NAMPT;ZC3H12A;UCP2;PDK4;PIM1;APOE;EDN1;GSN;JUP;CISH;ABCC6;LIF;VEGFB;FOS;NFATC4;NR4A1;CTRL;FASN;IRF1;CAT;BCL2;ANG;PTX3
80	Malignant tumor of cervix	35/884	2.64886e-06	0.000325413	2.34972	30.1736	CD83;CD82;CEBPD;TNFAIP2;PLAT;NDRG2;ACACB;FOXO1;HK2;SULT1A1;SOCS3;ZFP36;MUC1;EFEMP1;PPP2R1B;PLAU;MYBL2;SLIT2;SOX4;STAT5A;JUN;GSN;CISH;LAMB3;FZD4;TNFRSF10C;CYBA;MAPK8IP2;DKK3;NFKBIA;PAX8;FABP5;IRF1;CAT;BCL2
81	cervical cancer	37/965	2.83997e-06	0.000344583	2.27549	29.0619	CD83;CD82;CEBPD;GSTP1;TNFAIP2;PLAT;NDRG2;ACACB;FOXO1;HK2;SULT1A1;SOCS3;ZFP36;MUC1;EFEMP1;PPP2R1B;PLAU;MYBL2;SLIT2;SOX4;STAT5A;JUN;GSN;CISH;LAMB3;FZD4;TNFRSF10C;CYBA;MAPK8IP2;DKK3;NFKBIA;PAX8;FABP5;IRF1;CAT;BCL2;ANG
82	Refractory anemias	17/266	2.98957e-06	0.00035831	3.79286	48.2467	JUN;BTG2;CEBPB;JUND;GADD45B;TNC;G0S2;FOS;KLF2;ALDH1A3;IFI27;COL7A1;CAT;BCL2;FOSB;APOE;JUNB
83	Glomerulosclerosis (disorder)	11/112	3.04557e-06	0.000360625	5.82874	74.0356	CDKN1C;ENTPD1;EDN1;MUC1;ITGB4;ITGA2;TNC;BCL2;SLC2A1;APOE;FAH
84	Heart failure	33/815	3.23962e-06	0.000379035	2.40301	30.3742	CFD;NPR1;TNC;SLC2A1;CRMP1;PLAT;ARRB1;CXCL2;FBLN5;TM7SF2;ALDH2;NAMPT;ZC3H12A;UCP2;PDK4;PIM1;APOE;EDN1;GSN;JUP;CISH;ABCC6;LIF;VEGFB;FOS;NFATC4;NR4A1;FASN;IRF1;CAT;BCL2;ANG;PTX3
85	Glioblastoma Multiforme	34/854	3.29378e-06	0.000380838	2.36277	29.8263	COL18A1;TNC;SLC2A1;CRMP1;LAMC2;PRKCZ;HK2;TM7SF2;SOCS3;EFEMP1;RASD1;HEY1;PLAU;PIM1;SLIT2;GLUL;JUNB;PDK2;SOX4;JUN;JUND;CDKN2C;CISH;FZD4;TNFRSF10A;FOS;DUSP6;DKK3;IFI27;BCL6;CAT;BCL2;FOSB;EPHA2
86	Carcinoma breast stage IV	21/392	3.50844e-06	0.000400941	3.17931	39.9333	COL18A1;EDN1;CEBPB;PFKFB3;VCAM1;CD82;CEBPD;PLAT;CXCL1;LAMC2;RHOB;ALDH1A3;MUC1;BCL6;PLAU;FASN;RPS6KA1;BCL2;PTX3;MAPT;SOX4
87	Aortic Valve Insufficiency	15/214	3.74052e-06	0.000422549	4.15985	51.9827	STAT5A;JUN;EDN1;JUND;FOS;NDRG2;FOXO1;DKK3;MUC1;HEY1;CAT;BCL2;FOSB;JUNB;FKBP5
88	Sepsis	25/529	3.90405e-06	0.000436011	2.80469	34.9282	PFKFB3;PLAT;LAMC2;CXCL2;TM7SF2;SOCS3;NAMPT;UCP2;JUNB;JUN;EDN1;JUND;GSN;VCAM1;FOS;KLF2;NR4A2;PC;IFI27;FASN;SAA1;BCL2;FOSB;PTX3;PNPLA2
89	Neuroblastoma	54/1698	4.15075e-06	0.000458355	1.88737	23.3887	CDKN1C;COL18A1;BTG2;CD82;DOCK8;ITSN1;TNC;SLC2A1;PLAT;LAMC2;HK2;NAMPT;ZC3H12A;MYBL2;JUNB;EDN1;ITGA2;FOS;DKK3;PTP4A3;GPRC5A;IRF1;CAT;ANG;MAPT;ATF5;EPHA2;PRKAA2;MAOA;GLS2;GSTP1;MGST1;CRMP1;NDRG2;PRKCZ;FOXO1;SOCS3;MUC1;APOE;IGFBP6;SLIT2;STAT5A;NTRK2;JUN;EGLN3;JUND;CDKN2C;VCAM1;TNFRSF10C;NR4A2;NR4A3;SAA1;BCL2;FOSB
90	Glucocorticoid Receptor Deficiency	8/56	4.20093e-06	0.000458742	8.47817	104.961	CDKN1C;JUN;JUND;BCL2;FOSB;FOS;JUNB;FKBP5
91	Cerebral Ischemia	17/275	4.67166e-06	0.00050454	3.66873	45.03	JUN;CEBPB;JUND;SEMA3A;PLAT;FOS;TM7SF2;NFKBIA;ALDH2;PLAU;NAMPT;UCP2;CAT;BCL2;FOSB;APOE;JUNB
92	Septicemia	23/468	5.06883e-06	0.000541483	2.91663	35.5608	JUN;EDN1;JUND;PFKFB3;ITGB4;PLAT;FOS;CXCL2;KLF2;TM7SF2;NR4A2;SOCS3;PC;IFI27;FASN;NAMPT;UCP2;SAA1;BCL2;FOSB;PTX3;JUNB;PNPLA2
93	Neoplasms	43/1236	5.13884e-06	0.00054306	2.06467	25.1449	CDKN1C;CEBPB;DOCK8;SEMA3A;TNC;MT1X;LAMC2;NDRG2;FOXO1;HK2;SOCS3;ZFP36;MUC1;PGBD5;PLAU;RPS6KA1;UCP2;PDK4;SNCG;EMILIN1;MYBL2;SLIT2;SOX4;STAT5A;EDN1;EGLN3;GSN;VCAM1;FZD4;GPX3;MCAM;TNFRSF10A;MAPK8IP2;DKK3;NR4A1;IFI27;PAX8;BCL6;FASN;CAT;BCL2;OCIAD2;EPHA2
94	Malignant Glioma	24/504	5.38361e-06	0.000562874	2.82606	34.2861	CDKN1C;NTRK2;GSTP1;ITSN1;TNFSF13;TNC;TNFRSF10A;LAMC2;FOS;HK2;DKK3;NR4A1;ZFP36;EFEMP1;IFI27;PLAU;CAT;BCL2;LRIG1;ANGPTL4;RHPN2;SLIT2;ATF5;EPHA2
95	Malignant Head and Neck Neoplasm	23/470	5.43607e-06	0.000562376	2.90422	35.2063	STAT5A;COL18A1;JUN;JUND;CISH;S100A2;GPX3;GSTP1;TNFAIP2;CXCL1;FOS;SULT1A1;SOCS3;ZFP36;ALDH2;PLAU;BCL2;LRIG1;MMP19;FOSB;PTX3;JUNB;PDK2
96	Malignant neoplasm of thyroid	24/505	5.56664e-06	0.000569885	2.82046	34.124	JUN;EDN1;JUND;VCAM1;GSTP1;TNC;SLC2A1;FOS;NDRG2;DUSP6;RAP1GAP;REC8;DKK3;SOCS3;MUC1;CCDC80;IFI27;PAX8;ABI3BP;CAT;BCL2;FOSB;SLIT2;JUNB
97	Malignant neoplasm of endometrium	26/577	5.86709e-06	0.000594451	2.67422	32.2141	CD82;GSTP1;PLAT;ARRB1;CXCL1;CXCL2;AGPAT2;FOXO1;RAP1GAP;SULT1A1;PLAU;SNCG;IGFBP6;SOX4;ENTPD1;EDN1;VEGFB;FOS;DUSP6;DKK3;PER1;PAX8;RBP1;BCL2;MUC20;EPHA2
98	Metabolic Syndrome X	25/548	7.2032e-06	0.000722378	2.70744	32.0588	PRKAA2;CEBPD;ACACB;AGPAT2;FOXO1;TM7SF2;LIPE;SOCS3;ZFP36;ALDH2;NAMPT;UCP2;PDK4;APOE;ENTPD1;VCAM1;ACSL1;CYBA;IRF1;CAT;CRY2;PLIN4;PTX3;ANGPTL4;PNPLA2
99	Precancerous Conditions	22/446	7.69504e-06	0.000763908	2.92744	34.4704	STAT5A;JUND;CISH;GSTP1;SEMA3A;FHL1;CXCL1;LAMC2;FOS;ALDH4A1;NFKBIA;MUC1;ALDH2;PLAU;FASN;RBP1;CAT;PIM1;BCL2;MYBL2;HADH;EPHA2
100	Psoriasis	32/818	9.28117e-06	0.000912153	2.32165	26.9022	GSTP1;SEMA3A;SLC2A1;IL20RB;PLAT;CXCL1;PRKCZ;C4B;SOCS3;PLAU;APOE;JUNB;JUN;EDN1;JUND;PTPRN2;VCAM1;TNFSF13;USP2;FOS;NFKBIA;NR4A2;TSPAN14;GPRC5A;IFI27;IRF1;CAT;SAA1;BCL2;MMP19;FOSB;PTX3
* Bold terms are diabetes- and obesity-related diseases.
