# Supplementary material for: Integrated Analysis of Tissue-Specific Promoter Methylation and Gene Expression Profile in Complex Diseases
Source: Int J Mol Sci. 2020 Jul 17;21(14):5056. doi: 10.3390/ijms21145056 (PMC7404266; doi:10.3390/ijms21145056)
Supplement: Supplementary file 1 [file ijms-21-05056-s001.zip › Table_S4_Replication of obesity-associated methylation markers newly identified in the current study.xlsx]

## Sheet: Table S4
Table S4. Replication of obesity-associated methylation markers newly identified in the current study
CpG ID	Chr (hg19)	Position	HGNC symbol	Discovery(n=450) P-value	Replication (n=759) P-value	Replication (n=759) P-value (adj. T2D)
cg11826452	1	9599026	SLC25A33	8.46474e-07	0.181766	0.325825
cg20075528	1	42336652	HIVEP3	2.92487e-13	0.06356	0.177363
cg07150906	2	48771965	STON1;STON1-GTF2A1L	6.14754e-06	0.18905	0.114967
cg06919414	2	75061234	HK2	7.31703e-07	0.784478	0.993569
cg27589809	3	50650410	CISH	1.68769e-08	0.0160769	0.014773
cg13724379	3	187457714	BCL6	3.16558e-07	0.978386	0.816291
cg10559412	4	84457359	AGPAT9	9.84596e-07	0.829386	0.743659
cg00148252	4	89906159	FAM13A	4.86753e-12	0.148993	0.171138
cg20079523	4	89929546	FAM13A	2.728e-06	0.211188	0.229457
cg12149777	4	139937459	CCRN4L	1.65216e-06	0.998088	0.689069
cg25793197	5	31923469	PDZD2	5.82754e-06	0.728998	0.691293
cg05915281	5	131826479	IRF1	4.40323e-06	0.966056	0.917499
cg08891071	5	150399909	GPX3	6.08718e-06	0.131826	0.239484
cg04488703	6	14117117	CD83	1.42271e-07	0.319033	0.757914
cg01943813	6	24495061	ALDH5A1	1.66713e-06	0.664201	0.70454
cg00610228	6	35695934	FKBP5;LOC285847	1.5479e-10	0.506117	0.5983
cg07835966	6	44191417	SLC29A1	1.53269e-06	0.793212	0.768148
cg17075888	7	95225339	PDK4	4.74787e-06	1.09686e-08	0.000102223
cg06070414	7	95226412	PDK4	4.11e-07	0.386524	0.403771
cg05341053	10	6245051	PFKFB3	9.57257e-08	0.124669	0.146097
cg04361852	11	73694006	UCP2	8.47e-07	0.848365	0.67633
cg22110267	11	75052065	ARRB1	3.54027e-06	0.703831	0.524657
cg11287851	11	119187772	MCAM	1.29027e-08	0.336209	0.426947
cg06820837	12	52436478		9.26156e-06	0.207645	0.139245
cg20560869	12	52447054	NR4A1	1.44043e-06	0.00344518	0.0156276
cg03567117	12	52448859	NR4A1	4.66631e-06	0.0564901	0.0222009
cg27661600	12	56101736	ITGA7	7.00396e-07	0.576005	0.751321
cg09907201	12	56237315	MMP19	7.35936e-06	0.273115	0.130835
cg10404776	12	109622197	ACACB	7.4537e-06	0.0822983	0.0636813
cg21470387	12	112204761	ALDH2	1.31067e-06	0.756224	0.956507
cg21216204	13	41240503	FOXO1	3.35426e-06	0.940657	0.636056
cg14496983	14	21152213	RNASE4;ANG	4.56413e-06	0.112541	0.338601
cg04988187	15	80445147	FAH	2.45841e-06	0.180488	0.286568
cg15586420	15	90294517	MESP1	2.2231e-10	0.0787833	0.089253
cg09343327	16	20912245	DCUN1D3;LYRM1	6.15345e-08	0.489187	0.695925
cg20919549	16	46918616	GPT2	6.94e-07	0.87128	0.785763
cg16857868	16	46918622	GPT2	1.44108e-07	0.40125	0.554468
cg09548227	16	46918624	GPT2	1.60607e-08	0.23372	0.363411
cg06990298	17	17399700	RASD1	6.53429e-09	0.776469	0.862424
cg20367329	17	17399941	RASD1	7.94747e-09	0.524732	0.70947
cg08335779	17	18266993	SHMT1	8.43822e-06	0.301628	0.179779
cg00044095	17	43971892	MAPT;MAPT-AS1;MAPT-IT1	2e-09	0.402468	0.433793
cg13773723	17	43971894	MAPT;MAPT-AS1;MAPT-IT1	1.70679e-06	0.149368	0.25534
cg12982131	17	48172957	PDK2	2.24572e-07	0.972975	0.747583
cg15184507	17	48172962	PDK2	3.69232e-06	0.616456	0.630717
cg18156543	17	48172978	PDK2	5.15573e-10	0.300837	0.265261
cg02467794	17	55162598	AKAP1	3.60245e-06	0.364716	0.55452
cg20914502	17	55176671	AKAP1	1.01131e-05	0.59658	0.90333
cg00218203	17	74223696	RNF157	2.42068e-08	0.376924	0.333991
cg02836807	17	80040028	FASN	6.06078e-07	0.491952	0.137198
cg19250315	17	80040521	FASN	4.82768e-08	0.330194	0.369766
cg20482334	17	80048531	FASN	3.3e-08	0.229345	0.370236
cg03386722	17	80056517	FASN	3.72e-07	0.931345	0.865818
cg02161782	18	60893207	BCL2	5.66217e-08	0.480946	0.900338
cg04217152	18	60964691	BCL2	3.61673e-06	0.0500556	0.165562
cg12461368	18	60986654	BCL2	1.7e-08	0.612161	0.729418
cg07461160	19	16435233	KLF2	2.5894e-06	0.739599	0.548214
cg17361641	19	18391832	JUND	1.64592e-07	0.241925	0.269065
cg07051257	19	39897430	ZFP36	1.91e-07	0.512076	0.461009
cg16349006	20	48807369	CEBPB	1.27089e-06	0.957652	0.573917
cg04713110	21	35082287	ITSN1	1.36886e-07	0.976929	0.826733
cg23375190	22	25960673	ADRBK2	1.02039e-06	0.676933	0.886727
Bold CpGs were replicated with satisfied p-value threshold.
N/A stands for "Not Applicable".
