# Supplementary material for: Integrated Analysis of Tissue-Specific Promoter Methylation and Gene Expression Profile in Complex Diseases
Source: Int J Mol Sci. 2020 Jul 17;21(14):5056. doi: 10.3390/ijms21145056 (PMC7404266; doi:10.3390/ijms21145056)
Supplement: Supplementary file 1 [file ijms-21-05056-s001.zip › Table_S5_449 Tissue Specific Genes affected by proximal promoter methylation.xlsx]

## Sheet: Negatively correlated genes
Table S5. 449 Tissue Specific Genes affected by proximal promoter methylation (Negatively correlated genes)
Ensembl Gene ID	HGNC symbol	Correlation Coef.	Tau	Tissue
ENSG00000167676.3	PLIN4	-0.877014	0.987408	adipocyte
ENSG00000079435.5	LIPE	-0.413221	0.986877	adipocyte
ENSG00000056998.14	GYG2	-0.316636	0.981093	adipocyte
ENSG00000125618.12	PAX8	-0.934008	0.979753	kidney
ENSG00000186205.8	MARC1	-0.476973	0.97844	adipocyte
ENSG00000076555.11	ACACB	-0.312687	0.977498	adipocyte
ENSG00000197766.3	CFD	-0.399048	0.976983	adipocyte
ENSG00000141086.13	CTRL	-0.953231	0.97689	islet
ENSG00000119927.9	GPAM	-0.582542	0.972632	adipocyte
ENSG00000123689.5	G0S2	-0.33446	0.971894	adipocyte
ENSG00000135604.9	STX11	-0.565672	0.969982	adipocyte
ENSG00000196754.6	S100A2	-0.783838	0.969546	kidney
ENSG00000211445.7	GPX3	-0.392476	0.969379	adipocyte
ENSG00000164849.7	GPR146	-0.531619	0.969352	adipocyte
ENSG00000173267.9	SNCG	-0.546994	0.968574	adipocyte
ENSG00000189221.5	MAOA	-0.332709	0.968318	adipocyte
ENSG00000129946.6	SHC2	-0.557009	0.967313	islet
ENSG00000113361.8	CDH6	-0.563198	0.967112	kidney
ENSG00000166831.4	RBPMS2	-0.489873	0.967081	adipocyte
ENSG00000111275.8	ALDH2	-0.576564	0.966883	adipocyte
ENSG00000182118.5	FAM89A	-0.595827	0.966821	adipocyte
ENSG00000173432.6	SAA1	-0.723227	0.963428	adipocyte
ENSG00000167641.6	PPP1R14A	-0.807348	0.959942	adipocyte
ENSG00000169418.9	NPR1	-0.865661	0.958774	adipocyte
ENSG00000184557.3	SOCS3	-0.388599	0.958417	adipocyte
ENSG00000173110.6	HSPA6	-0.738658	0.958065	adipocyte
ENSG00000108960.3	MMD	-0.571068	0.957955	adipocyte
ENSG00000177666.11	PNPLA2	-0.356415	0.957421	adipocyte
ENSG00000187634.6	SAMD11	-0.730574	0.956997	islet
ENSG00000122861.11	PLAU	-0.454792	0.955412	kidney
ENSG00000148053.11	NTRK2	-0.437651	0.955053	adipocyte
ENSG00000125740.9	FOSB	-0.49145	0.952963	adipocyte
ENSG00000003096.9	KLHL13	-0.582498	0.951985	kidney
ENSG00000096060.10	FKBP5	-0.932989	0.949186	adipocyte
ENSG00000008735.10	MAPK8IP2	-0.462863	0.948358	islet
ENSG00000133401.11	PDZD2	-0.607871	0.947848	adipocyte
ENSG00000108551.4	RASD1	-0.940954	0.947702	adipocyte
ENSG00000173175.10	ADCY5	-0.751397	0.947127	adipocyte
ENSG00000159388.5	BTG2	-0.616241	0.946266	adipocyte
ENSG00000059915.12	PSD	-0.526092	0.945299	islet
ENSG00000128016.4	ZFP36	-0.318059	0.944578	adipocyte
ENSG00000183018.4	SPNS2	-0.431008	0.943641	kidney
ENSG00000135424.11	ITGA7	-0.369056	0.943561	adipocyte
ENSG00000165795.16	NDRG2	-0.54339	0.942586	adipocyte
ENSG00000182253.10	SYNM	-0.93105	0.942118	adipocyte
ENSG00000173334.3	TRIB1	-0.396511	0.941752	adipocyte
ENSG00000130203.5	APOE	-0.903627	0.941358	adipocyte
ENSG00000148339.8	SLC25A25	-0.576998	0.940804	adipocyte
ENSG00000058085.10	LAMC2	-0.56174	0.940798	kidney
ENSG00000004799.7	PDK4	-0.462217	0.93815	adipocyte
ENSG00000170525.14	PFKFB3	-0.572368	0.93804	adipocyte
ENSG00000151726.9	ACSL1	-0.301994	0.937205	adipocyte
ENSG00000173599.9	PC	-0.630036	0.934289	adipocyte
ENSG00000013588.5	GPRC5A	-0.381373	0.934204	kidney
ENSG00000091262.10	ABCC6	-0.372281	0.934124	adipocyte
ENSG00000155093.13	PTPRN2	-0.35497	0.93356	islet
ENSG00000166823.5	MESP1	-0.428729	0.933206	adipocyte
ENSG00000114115.5	RBP1	-0.458741	0.932703	islet
ENSG00000112149.5	CD83	-0.555753	0.931496	adipocyte
ENSG00000100077.10	ADRBK2	-0.578013	0.931175	adipocyte
ENSG00000171208.5	NETO2	-0.438671	0.931093	kidney
ENSG00000135821.12	GLUL	-0.819898	0.930432	adipocyte
ENSG00000184489.7	PTP4A3	-0.333748	0.930119	islet
ENSG00000107099.11	DOCK8	-0.68434	0.929702	adipocyte
ENSG00000168280.12	KIF5C	-0.454923	0.92947	islet
ENSG00000174804.3	FZD4	-0.369962	0.929151	adipocyte
ENSG00000173918.10	C1QTNF1	-0.866289	0.928953	adipocyte
ENSG00000197415.7	VEPH1	-0.600348	0.927792	smc
ENSG00000177614.5	PGBD5	-0.475461	0.927682	kidney
ENSG00000249087.3	C1orf213	-0.548089	0.926714	adipocyte
ENSG00000099860.4	GADD45B	-0.454055	0.926404	adipocyte
ENSG00000177606.5	JUN	-0.654174	0.92577	adipocyte
ENSG00000154175.12	ABI3BP	-0.482009	0.925084	smc
ENSG00000123342.11	MMP19	-0.430179	0.92469	adipocyte
ENSG00000089723.5	OTUB2	-0.38936	0.924078	kidney
ENSG00000138185.12	ENTPD1	-0.577981	0.924075	smc
ENSG00000169692.8	AGPAT2	-0.415774	0.922669	adipocyte
ENSG00000178531.4	CTXN1	-0.477279	0.921362	kidney
ENSG00000131480.4	AOC2	-0.351769	0.920826	adipocyte
ENSG00000167772.7	ANGPTL4	-0.340912	0.92062	adipocyte
ENSG00000129521.9	EGLN3	-0.348466	0.920488	kidney
ENSG00000171223.4	JUNB	-0.48023	0.920192	adipocyte
ENSG00000127528.5	KLF2	-0.598527	0.919862	adipocyte
ENSG00000112541.9	PDE10A	-0.441986	0.919111	kidney
ENSG00000224389.4	C4B	-0.314365	0.91762	islet
ENSG00000157617.12	C2CD2	-0.760746	0.916803	adipocyte
ENSG00000085831.11	TTC39A	-0.554364	0.916729	islet
ENSG00000072832.10	CRMP1	-0.602957	0.916573	islet
ENSG00000176945.12	MUC20	-0.88173	0.916507	islet
ENSG00000168672.3	FAM84B	-0.343014	0.915599	kidney
ENSG00000126561.12	STAT5A	-0.444008	0.915259	adipocyte
ENSG00000076864.15	RAP1GAP	-0.522233	0.914964	islet
ENSG00000111490.8	TBC1D30	-0.542659	0.912813	islet
ENSG00000046604.8	DSG2	-0.567999	0.912769	kidney
ENSG00000137193.9	PIM1	-0.484571	0.912073	adipocyte
ENSG00000170345.5	FOS	-0.458983	0.91178	adipocyte
ENSG00000121691.4	CAT	-0.457914	0.910518	adipocyte
ENSG00000177380.9	PPFIA3	-0.539716	0.909122	islet
ENSG00000145247.7	OCIAD2	-0.566772	0.908323	kidney
ENSG00000128342.4	LIF	-0.500922	0.907836	kidney
ENSG00000180354.11	C7orf41	-0.344607	0.907443	adipocyte
ENSG00000103876.7	FAH	-0.364757	0.907092	adipocyte
ENSG00000169710.6	FASN	-0.687568	0.906392	adipocyte
ENSG00000022267.12	FHL1	-0.432946	0.90613	adipocyte
ENSG00000135423.8	GLS2	-0.746454	0.905352	islet
ENSG00000163545.7	NUAK2	-0.504608	0.905146	kidney
ENSG00000163814.3	CDCP1	-0.341348	0.904461	kidney
ENSG00000187193.8	MT1X	-0.733326	0.903124	adipocyte
ENSG00000164687.6	FABP5	-0.320459	0.902794	adipocyte
ENSG00000086619.9	ERO1LB	-0.411719	0.901695	islet
ENSG00000041982.10	TNC	-0.67273	0.901063	fibroblast
ENSG00000142627.9	EPHA2	-0.619958	0.900482	kidney
ENSG00000115380.14	EFEMP1	-0.508124	0.899755	smc
ENSG00000171791.10	BCL2	-0.61073	0.899552	adipocyte
ENSG00000115459.13	ELMOD3	-0.39466	0.899434	adipocyte
ENSG00000170145.4	SIK2	-0.457696	0.899322	adipocyte
ENSG00000091986.11	CCDC80	-0.506089	0.899036	smc
ENSG00000241935.4	HOGA1	-0.860367	0.898648	kidney
ENSG00000008394.8	MGST1	-0.960681	0.898252	adipocyte
ENSG00000167779.3	IGFBP6	-0.319146	0.898201	smc
ENSG00000145147.15	SLIT2	-0.309025	0.89726	fibroblast
ENSG00000173801.12	JUP	-0.647951	0.897083	kidney
ENSG00000163739.4	CXCL1	-0.306136	0.896841	kidney
ENSG00000163050.12	ADCK3	-0.537923	0.895606	adipocyte
ENSG00000117676.9	RPS6KA1	-0.388269	0.893449	kidney
ENSG00000127399.10	LRRC61	-0.764852	0.892405	kidney
ENSG00000106089.7	STX1A	-0.576837	0.892074	islet
ENSG00000117266.11	CDK18	-0.460718	0.891476	kidney
ENSG00000117394.15	SLC2A1	-0.34684	0.89022	kidney
ENSG00000165644.6	COMTD1	-0.52773	0.890065	islet
ENSG00000099812.6	MISP	-0.699181	0.889362	kidney
ENSG00000147576.11	ADHFE1	-0.316711	0.888631	adipocyte
ENSG00000138678.6	AGPAT9	-0.648963	0.88854	adipocyte
ENSG00000138772.8	ANXA3	-0.492377	0.887493	kidney
ENSG00000174564.8	IL20RB	-0.500002	0.887305	smc
ENSG00000179094.9	PER1	-0.695943	0.886511	adipocyte
ENSG00000118804.7	FAM47E-STBD1	-0.418156	0.886099	adipocyte
ENSG00000141576.10	RNF157	-0.380985	0.886063	adipocyte
ENSG00000173926.5	MARCH3	-0.703861	0.885139	adipocyte
ENSG00000078401.6	EDN1	-0.508754	0.884989	kidney
ENSG00000100906.6	NFKBIA	-0.512572	0.884959	adipocyte
ENSG00000162692.6	VCAM1	-0.374531	0.884202	kidney
ENSG00000186868.11	MAPT	-0.672775	0.884158	adipocyte
ENSG00000136842.9	TMOD1	-0.705161	0.883663	islet
ENSG00000125775.10	SDCBP2	-0.80331	0.883578	islet
ENSG00000148426.8	PROSER2	-0.481445	0.883116	kidney
ENSG00000119711.8	ALDH6A1	-0.350233	0.883044	adipocyte
ENSG00000163661.3	PTX3	-0.511119	0.882867	smc
ENSG00000204257.10	HLA-DMA	-0.467648	0.882742	adipocyte
ENSG00000131941.3	RHPN2	-0.457735	0.882535	kidney
ENSG00000132002.3	DNAJB1	-0.418764	0.882337	adipocyte
ENSG00000122971.4	ACADS	-0.742377	0.88071	adipocyte
ENSG00000138640.10	FAM13A	-0.511092	0.877842	adipocyte
ENSG00000127824.9	TUBA4A	-0.662439	0.877548	kidney
ENSG00000138079.9	SLC3A1	-0.478504	0.877129	islet
ENSG00000065717.10	TLE2	-0.520168	0.876334	islet
ENSG00000166562.4	SEC11C	-0.477938	0.875994	islet
ENSG00000104689.5	TNFRSF10A	-0.356767	0.87498	kidney
ENSG00000111186.8	WNT5B	-0.334388	0.874434	fibroblast
ENSG00000179604.8	CDC42EP4	-0.847729	0.874389	adipocyte
ENSG00000119508.13	NR4A3	-0.567551	0.874115	adipocyte
ENSG00000169136.4	ATF5	-0.395218	0.873128	smc
ENSG00000134871.13	COL4A2	-0.357603	0.872827	kidney
ENSG00000204396.6	VWA7	-0.62568	0.872283	islet
ENSG00000132359.9	RAP1GAP2	-0.712137	0.871498	islet
ENSG00000166123.9	GPT2	-0.711205	0.870671	adipocyte
ENSG00000123080.6	CDKN2C	-0.399892	0.869384	adipocyte
ENSG00000125347.9	IRF1	-0.532821	0.868702	adipocyte
ENSG00000172348.10	RCAN2	-0.30321	0.867227	fibroblast
ENSG00000164056.6	SPRY1	-0.395409	0.867104	adipocyte
ENSG00000188747.4	NOXA1	-0.518858	0.865861	islet
ENSG00000159423.12	ALDH4A1	-0.309429	0.865732	adipocyte
ENSG00000003249.9	DBNDD1	-0.410195	0.86573	kidney
ENSG00000020181.13	GPR124	-0.714425	0.86568	fibroblast
ENSG00000101057.11	MYBL2	-0.796653	0.8656	kidney
ENSG00000159399.5	HK2	-0.627971	0.8653	adipocyte
ENSG00000149809.10	TM7SF2	-0.382955	0.865104	adipocyte
ENSG00000221869.4	CEBPD	-0.417813	0.864236	adipocyte
ENSG00000105048.12	TNNT1	-0.87455	0.862635	kidney
ENSG00000102890.10	ELMO3	-0.858509	0.862377	islet
ENSG00000114270.11	COL7A1	-0.604858	0.862326	kidney
ENSG00000104368.13	PLAT	-0.394165	0.862094	smc
ENSG00000132470.9	ITGB4	-0.410766	0.861878	kidney
ENSG00000185022.7	MAFF	-0.704807	0.861876	adipocyte
ENSG00000076706.10	MCAM	-0.478155	0.859999	adipocyte
ENSG00000144749.9	LRIG1	-0.386672	0.859833	adipocyte
ENSG00000184254.12	ALDH1A3	-0.478591	0.858581	kidney
ENSG00000185100.6	ADSSL1	-0.541697	0.858336	adipocyte
ENSG00000175567.4	UCP2	-0.547914	0.85733	adipocyte
ENSG00000272414.1	FAM47E	-0.484428	0.857184	adipocyte
ENSG00000138796.11	HADH	-0.776114	0.855442	adipocyte
ENSG00000185499.12	MUC1	-0.495579	0.854853	islet
ENSG00000139318.7	DUSP6	-0.367261	0.854075	adipocyte
ENSG00000235750.5	KIAA0040	-0.59188	0.853117	adipocyte
ENSG00000138771.10	SHROOM3	-0.503657	0.852533	kidney
ENSG00000143878.8	RHOB	-0.492235	0.852184	adipocyte
ENSG00000106624.4	AEBP1	-0.426319	0.851882	fibroblast
ENSG00000243244.1	STON1	-0.688615	0.851313	adipocyte
ENSG00000112414.10	GPR126	-0.485983	0.851027	kidney
ENSG00000183508.4	FAM46C	-0.405959	0.850337	islet
ENSG00000173511.5	VEGFB	-0.418681	0.849768	adipocyte
ENSG00000138080.9	EMILIN1	-0.666129	0.849477	fibroblast
ENSG00000101194.13	SLC17A9	-0.450098	0.848619	fibroblast
ENSG00000148180.12	GSN	-0.634386	0.848591	adipocyte
ENSG00000113916.13	BCL6	-0.487358	0.84808	adipocyte
ENSG00000112294.8	ALDH5A1	-0.628453	0.847948	adipocyte
ENSG00000085117.7	CD82	-0.303581	0.847544	kidney
ENSG00000108219.10	TSPAN14	-0.308021	0.847419	kidney
ENSG00000121671.7	CRY2	-0.480004	0.846747	adipocyte
ENSG00000212123.3	PRR22	-0.719595	0.846427	islet
ENSG00000114737.11	CISH	-0.563982	0.845311	adipocyte
ENSG00000250305.4	KIAA1456	-0.414301	0.845171	fibroblast
ENSG00000171729.9	TMEM51	-0.343309	0.844981	kidney
ENSG00000101311.11	FERMT1	-0.603375	0.844976	kidney
ENSG00000102057.5	KCND1	-0.417993	0.844541	kidney
ENSG00000132510.6	KDM6B	-0.352466	0.844502	adipocyte
ENSG00000156463.13	SH3RF2	-0.317585	0.844407	kidney
ENSG00000050165.13	DKK3	-0.730678	0.844186	fibroblast
ENSG00000168916.11	ZNF608	-0.576332	0.843989	kidney
ENSG00000151320.6	AKAP6	-0.558256	0.843942	fibroblast
ENSG00000177685.12	EFCAB4A	-0.70385	0.842647	islet
ENSG00000117479.8	SLC19A2	-0.7808	0.842543	adipocyte
ENSG00000162409.6	PRKAA2	-0.429786	0.842425	kidney
ENSG00000105767.2	CADM4	-0.538194	0.84211	kidney
ENSG00000214274.5	ANG	-0.348705	0.840959	adipocyte
ENSG00000147872.5	PLIN2	-0.825706	0.83958	adipocyte
ENSG00000172216.4	CEBPB	-0.450776	0.839511	adipocyte
ENSG00000150907.6	FOXO1	-0.731089	0.83949	adipocyte
ENSG00000142910.11	TINAGL1	-0.611769	0.839035	kidney
ENSG00000196878.8	LAMB3	-0.974719	0.838541	kidney
ENSG00000137713.11	PPP2R1B	-0.772542	0.838394	adipocyte
ENSG00000051620.6	HEBP2	-0.474633	0.83831	adipocyte
ENSG00000163874.8	ZC3H12A	-0.579959	0.838185	adipocyte
ENSG00000188277.8	C15orf62	-0.93013	0.838038	kidney
ENSG00000196502.7	SULT1A1	-0.521907	0.837797	adipocyte
ENSG00000105835.7	NAMPT	-0.499178	0.837589	adipocyte
ENSG00000165949.8	IFI27	-0.456705	0.836505	smc
ENSG00000090776.5	EFNB1	-0.531308	0.836444	kidney
ENSG00000140092.10	FBLN5	-0.761083	0.83628	fibroblast
ENSG00000160886.9	LY6K	-0.447575	0.836075	fibroblast
ENSG00000180921.6	FAM83H	-0.410969	0.835462	kidney
ENSG00000162461.7	SLC25A34	-0.871276	0.835161	islet
ENSG00000168237.13	GLYCTK	-0.716586	0.834797	adipocyte
ENSG00000197506.6	SLC28A3	-0.927171	0.834499	islet
ENSG00000130590.9	SAMD10	-0.430579	0.834378	kidney
ENSG00000131943.13	C19orf12	-0.494426	0.833647	adipocyte
ENSG00000163638.9	ADAMTS9	-0.372567	0.833571	kidney
ENSG00000177427.8	MIEF2	-0.355141	0.832614	kidney
ENSG00000164683.12	HEY1	-0.420159	0.832392	islet
ENSG00000137486.12	ARRB1	-0.459776	0.830366	adipocyte
ENSG00000214193.5	SH3D21	-0.323952	0.829481	kidney
ENSG00000091490.6	SEL1L3	-0.57685	0.828878	kidney
ENSG00000036672.11	USP2	-0.350333	0.828664	islet
ENSG00000166923.6	GREM1	-0.389045	0.827847	fibroblast
ENSG00000148498.11	PARD3	-0.362369	0.827497	kidney
ENSG00000123358.15	NR4A1	-0.685667	0.827217	adipocyte
ENSG00000141295.9	SCRN2	-0.611629	0.826903	adipocyte
ENSG00000075213.6	SEMA3A	-0.605984	0.825794	fibroblast
ENSG00000111077.13	TENC1	-0.705421	0.82548	adipocyte
ENSG00000185215.4	TNFAIP2	-0.308762	0.825447	kidney
ENSG00000151014.4	CCRN4L	-0.572806	0.82519	adipocyte
ENSG00000079257.3	LXN	-0.313334	0.824486	smc
ENSG00000163734.4	CXCL3	-0.392414	0.823935	adipocyte
ENSG00000163879.9	DNALI1	-0.69814	0.823794	islet
ENSG00000104450.8	SPAG1	-0.60098	0.823659	kidney
ENSG00000067606.11	PRKCZ	-0.531368	0.822606	kidney
ENSG00000133816.9	MICAL2	-0.849875	0.822185	kidney
ENSG00000130653.11	PNPLA7	-0.747187	0.821991	adipocyte
ENSG00000205726.9	ITSN1	-0.545473	0.821601	adipocyte
ENSG00000111816.6	FRK	-0.638126	0.821462	kidney
ENSG00000129757.8	CDKN1C	-0.949943	0.821167	adipocyte
ENSG00000081041.8	CXCL2	-0.747991	0.820834	adipocyte
ENSG00000100068.7	LRP5L	-0.355073	0.820575	islet
ENSG00000182704.6	TSKU	-0.532657	0.819917	adipocyte
ENSG00000119185.8	ITGB1BP1	-0.729149	0.819111	adipocyte
ENSG00000204381.7	LAYN	-0.510393	0.818882	fibroblast
ENSG00000161955.12	TNFSF13	-0.364225	0.817819	kidney
ENSG00000149633.7	KIAA1755	-0.421872	0.817392	smc
ENSG00000084207.11	GSTP1	-0.362125	0.8171	kidney
ENSG00000099785.6	MARCH2	-0.400386	0.816293	adipocyte
ENSG00000254402.2	LRRC24	-0.546908	0.816063	islet
ENSG00000258818.2	RNASE4	-0.338189	0.815798	adipocyte
ENSG00000153234.9	NR4A2	-0.350297	0.815659	adipocyte
ENSG00000169738.3	DCXR	-0.561928	0.815404	adipocyte
ENSG00000171612.6	SLC25A33	-0.710704	0.815274	adipocyte
ENSG00000124508.12	BTN2A2	-0.321852	0.815227	kidney
ENSG00000147144.8	CCDC120	-0.431799	0.815107	kidney
ENSG00000162511.7	LAPTM5	-0.617614	0.814998	adipocyte
ENSG00000172057.5	ORMDL3	-0.594333	0.814935	adipocyte
ENSG00000061656.5	SPAG4	-0.368387	0.814917	islet
ENSG00000182871.10	COL18A1	-0.604635	0.814682	kidney
ENSG00000160460.11	SPTBN4	-0.340339	0.814527	islet
ENSG00000121057.8	AKAP1	-0.573539	0.813239	adipocyte
ENSG00000188215.5	DCUN1D3	-0.574835	0.812909	adipocyte
ENSG00000213462.4	ERV3-1	-0.532161	0.812848	adipocyte
ENSG00000066027.7	PPP2R5A	-0.609368	0.812844	adipocyte
ENSG00000005882.7	PDK2	-0.394419	0.812535	adipocyte
ENSG00000125089.12	SH3TC1	-0.665876	0.81251	islet
ENSG00000124766.4	SOX4	-0.398109	0.81234	kidney
ENSG00000100968.9	NFATC4	-0.967153	0.812162	fibroblast
ENSG00000135378.3	PRRG4	-0.407433	0.812124	kidney
ENSG00000051523.6	CYBA	-0.425656	0.81135	kidney
ENSG00000101400.5	SNTA1	-0.534947	0.81105	adipocyte
ENSG00000134602.11	MST4	-0.465093	0.810747	kidney
ENSG00000152926.10	ZNF117	-0.556343	0.810502	adipocyte
ENSG00000196715.5	VKORC1L1	-0.46305	0.810283	adipocyte
ENSG00000128849.9	CGNL1	-0.731464	0.809386	kidney
ENSG00000141854.3	hsa-mir-1199	-0.770445	0.808942	islet
ENSG00000121653.7	MAPK8IP1	-0.307988	0.808618	islet
ENSG00000130962.13	PRRG1	-0.477006	0.80848	kidney
ENSG00000130522.4	JUND	-0.729953	0.808386	adipocyte
ENSG00000188643.6	S100A16	-0.738432	0.808248	kidney
ENSG00000176974.13	SHMT1	-0.674789	0.807704	adipocyte
ENSG00000186862.13	PDZD7	-0.303522	0.806725	kidney
ENSG00000160888.6	IER2	-0.433301	0.806712	adipocyte
ENSG00000127124.9	HIVEP3	-0.609774	0.806117	adipocyte
ENSG00000158615.8	PPP1R15B	-0.35596	0.80606	adipocyte
ENSG00000177943.9	MAMDC4	-0.611343	0.805768	islet
ENSG00000140403.8	DNAJA4	-0.784935	0.805248	adipocyte
ENSG00000185442.8	FAM174B	-0.434356	0.804853	islet
ENSG00000164171.6	ITGA2	-0.465246	0.804353	kidney
ENSG00000163126.10	ANKRD23	-0.484509	0.803885	islet
ENSG00000173535.9	TNFRSF10C	-0.321347	0.80386	kidney
ENSG00000147044.16	CASK	-0.422066	0.803044	kidney
ENSG00000105738.6	SIPA1L3	-0.323998	0.802972	kidney
ENSG00000211584.9	SLC48A1	-0.730827	0.802856	kidney
ENSG00000107551.16	RASSF4	-0.361464	0.802701	kidney
ENSG00000008277.10	ADAM22	-0.775633	0.802592	adipocyte
ENSG00000198794.7	SCAMP5	-0.302482	0.802478	islet
ENSG00000142149.4	HUNK	-0.481046	0.802371	fibroblast
ENSG00000137959.11	IFI44L	-0.310388	0.801986	smc
ENSG00000142102.11	ATHL1	-0.49496	0.801544	islet
ENSG00000187231.9	SESTD1	-0.521114	0.801508	adipocyte
ENSG00000105472.8	CLEC11A	-0.598288	0.801131	fibroblast
ENSG00000170293.4	CMTM8	-0.597278	0.801052	islet
ENSG00000172738.7	TMEM217	-0.330602	0.800659	kidney
ENSG00000100918.8	REC8	-0.423683	0.800175	kidney

## Sheet: Positively correlated genes
Table S5. 449 Tissue Specific Genes affected by proximal promoter methylation (Positively correlated genes)
Ensembl Gene ID	HGNC symbol	Correlation Coef.	Tau	Tissue
ENSG00000107742.8	SPOCK2	0.447186	0.969067	kidney
ENSG00000135636.9	DYSF	0.715081	0.950663	kidney
ENSG00000124212.5	PTGIS	0.313308	0.945336	smc
ENSG00000079337.11	RAPGEF3	0.332705	0.944862	kidney
ENSG00000085662.9	AKR1B1	0.699165	0.941891	kidney
ENSG00000139725.3	RHOF	0.375085	0.93959	kidney
ENSG00000106003.8	LFNG	0.67158	0.93876	kidney
ENSG00000204388.5	HSPA1B	0.48669	0.936453	adipocyte
ENSG00000005884.13	ITGA3	0.350888	0.935129	kidney
ENSG00000130475.10	FCHO1	0.337554	0.933745	kidney
ENSG00000160678.7	S100A1	0.444613	0.932136	adipocyte
ENSG00000183876.8	ARSI	0.632447	0.93037	kidney
ENSG00000198959.7	TGM2	0.440465	0.927052	kidney
ENSG00000125966.8	MMP24	0.959547	0.922437	kidney
ENSG00000102879.11	CORO1A	0.466882	0.919074	kidney
ENSG00000143416.16	SELENBP1	0.856398	0.918346	adipocyte
ENSG00000196549.6	MME	0.604799	0.91798	fibroblast
ENSG00000171227.6	TMEM37	0.364705	0.916773	adipocyte
ENSG00000139211.5	AMIGO2	0.367566	0.916144	kidney
ENSG00000123700.4	KCNJ2	0.780029	0.914592	fibroblast
ENSG00000258947.2	TUBB3	0.966049	0.914038	kidney
ENSG00000167861.11	HID1	0.952261	0.912174	islet
ENSG00000006016.6	CRLF1	0.411251	0.906457	smc
ENSG00000114251.9	WNT5A	0.603358	0.904122	fibroblast
ENSG00000124615.13	MOCS1	0.851161	0.902569	adipocyte
ENSG00000136490.4	LIMD2	0.576503	0.901975	kidney
ENSG00000171451.13	DSEL	0.510104	0.899044	fibroblast
ENSG00000137393.8	RNF144B	0.637247	0.897738	kidney
ENSG00000180336.13	C17orf104	0.872113	0.892445	kidney
ENSG00000162458.8	FBLIM1	0.517193	0.892385	kidney
ENSG00000161921.10	CXCL16	0.719928	0.891911	kidney
ENSG00000115041.8	KCNIP3	0.880795	0.891057	kidney
ENSG00000128266.7	GNAZ	0.76928	0.890916	islet
ENSG00000105290.7	APLP1	0.417801	0.890744	islet
ENSG00000088881.16	EBF4	0.934952	0.889492	islet
ENSG00000145416.9	MARCH1	0.55797	0.885032	kidney
ENSG00000128340.10	RAC2	0.984984	0.882045	kidney
ENSG00000168071.17	CCDC88B	0.479645	0.879786	islet
ENSG00000131435.8	PDLIM4	0.834815	0.879214	kidney
ENSG00000042286.10	AIFM2	0.339149	0.878909	adipocyte
ENSG00000142173.10	COL6A2	0.581557	0.878276	fibroblast
ENSG00000100003.13	SEC14L2	0.54443	0.877259	kidney
ENSG00000172201.6	ID4	0.846144	0.876902	adipocyte
ENSG00000075223.9	SEMA3C	0.374837	0.87663	smc
ENSG00000144655.10	CSRNP1	0.580916	0.875119	adipocyte
ENSG00000067057.12	PFKP	0.65832	0.874113	kidney
ENSG00000137411.12	VARS2	0.319787	0.872052	kidney
ENSG00000152642.6	GPD1L	0.36788	0.872	adipocyte
ENSG00000147394.14	ZNF185	0.593181	0.87047	kidney
ENSG00000054392.8	HHAT	0.855201	0.868606	kidney
ENSG00000258130.3	RP11-347C12.3	0.355673	0.868506	kidney
ENSG00000119673.10	ACOT2	0.392308	0.867634	adipocyte
ENSG00000100399.11	CHADL	0.467245	0.866821	adipocyte
ENSG00000166206.9	GABRB3	0.333996	0.866293	islet
ENSG00000123453.12	SARDH	0.844572	0.864644	islet
ENSG00000119514.5	GALNT12	0.57303	0.864059	smc
ENSG00000025434.14	NR1H3	0.70784	0.861957	adipocyte
ENSG00000205336.7	GPR56	0.74225	0.86165	kidney
ENSG00000120129.5	DUSP1	0.875609	0.859447	adipocyte
ENSG00000084731.9	KIF3C	0.358279	0.857692	kidney
ENSG00000136040.4	PLXNC1	0.668958	0.857595	fibroblast
ENSG00000196189.8	SEMA4A	0.323155	0.853094	adipocyte
ENSG00000159403.11	C1R	0.495733	0.852512	smc
ENSG00000188707.4	ZBED6CL	0.888299	0.849454	kidney
ENSG00000162407.8	PPAP2B	0.750935	0.849381	smc
ENSG00000185745.8	IFIT1	0.836306	0.84843	smc
ENSG00000101134.7	DOK5	0.984313	0.846068	smc
ENSG00000157551.13	KCNJ15	0.412819	0.843729	kidney
ENSG00000114529.8	C3orf52	0.665473	0.84357	kidney
ENSG00000154127.5	UBASH3B	0.309786	0.843135	kidney
ENSG00000173638.14	SLC19A1	0.513192	0.841993	kidney
ENSG00000130513.6	GDF15	0.861116	0.839935	islet
ENSG00000136960.8	ENPP2	0.922163	0.838907	fibroblast
ENSG00000109743.6	BST1	0.465038	0.83885	smc
ENSG00000017621.11	MAGIX	0.556411	0.83868	islet
ENSG00000132561.9	MATN2	0.689211	0.838147	kidney
ENSG00000163975.7	MFI2	0.930025	0.838073	kidney
ENSG00000182326.10	C1S	0.335919	0.837845	smc
ENSG00000165929.8	TC2N	0.53133	0.836891	islet
ENSG00000087494.11	PTHLH	0.400292	0.835808	kidney
ENSG00000189159.11	HN1	0.409471	0.835449	kidney
ENSG00000100505.9	TRIM9	0.592255	0.835374	islet
ENSG00000134824.9	FADS2	0.522617	0.834326	fibroblast
ENSG00000103485.13	QPRT	0.850993	0.833423	kidney
ENSG00000074410.9	CA12	0.443714	0.833302	smc
ENSG00000127955.11	GNAI1	0.416876	0.832756	adipocyte
ENSG00000171608.11	PIK3CD	0.524802	0.830816	kidney
ENSG00000001617.7	SEMA3F	0.306348	0.827804	kidney
ENSG00000166147.9	FBN1	0.628006	0.827462	smc
ENSG00000163659.8	TIPARP	0.43915	0.826056	adipocyte
ENSG00000229644.4	NAMPTL	0.34205	0.823849	adipocyte
ENSG00000065320.4	NTN1	0.322152	0.823758	fibroblast
ENSG00000145390.7	USP53	0.86006	0.823396	smc
ENSG00000132321.12	IQCA1	0.873089	0.823211	kidney
ENSG00000135931.13	ARMC9	0.426813	0.822882	fibroblast
ENSG00000099337.3	KCNK6	0.313214	0.821714	kidney
ENSG00000023892.9	DEF6	0.928701	0.820115	islet
ENSG00000183688.4	FAM101B	0.550477	0.819925	fibroblast
ENSG00000113739.6	STC2	0.672013	0.819504	fibroblast
ENSG00000090920.9	FCGBP	0.603147	0.818163	islet
ENSG00000166033.7	HTRA1	0.499988	0.817638	fibroblast
ENSG00000176720.3	BOK	0.69467	0.817314	adipocyte
ENSG00000136943.6	CTSV	0.891183	0.81671	kidney
ENSG00000073008.10	PVR	0.729149	0.816334	kidney
ENSG00000162599.11	NFIA	0.358268	0.816008	adipocyte
ENSG00000009413.11	REV3L	0.331558	0.815023	fibroblast
ENSG00000105810.5	CDK6	0.329577	0.81378	kidney
ENSG00000135905.14	DOCK10	0.942263	0.812532	fibroblast
ENSG00000159314.7	ARHGAP27	0.558452	0.81155	kidney
ENSG00000160973.7	FOXH1	0.805	0.809716	islet
ENSG00000106571.8	GLI3	0.334238	0.805834	fibroblast
ENSG00000243251.4	PGBD3	0.801742	0.803468	smc
