# Supplementary material for: Integrated Analysis of Tissue-Specific Promoter Methylation and Gene Expression Profile in Complex Diseases
Source: Int J Mol Sci. 2020 Jul 17;21(14):5056. doi: 10.3390/ijms21145056 (PMC7404266; doi:10.3390/ijms21145056)
Supplement: Supplementary file 1 [file ijms-21-05056-s001.zip › Table_S6_Sample information (Number of mapped reads).xlsx]

## Sheet: Table S6
Table S6. Sample information (Number of mapped reads)
Sample	WGBS	mRNA-seq	ChIP-seq
			H3K27ac	H3K27me3	H3K36me3	H3K4me1	H3K4me3	H3K9me3	INPUT
adipocyte_1	1729228120	91197864	-	-	-	-	-	-	-
adipocyte_2	1542187220	65100204	-	-	-	-	-	-	-
adipocyte_3	1585639536	71480608	-	-	-	-	-	-	-
adipocyte_4	1553519824	71903274	-	-	-	-	-	-	-
adipocyte_5	1852664664	76941770	-	-	-	-	-	-	-
adipocyte_6	1723825184	76654628	-	-	-	-	-	-	-
adipocyte_7	1515081594	74380180	-	-	-	-	-	-	-
adipocyte_8	1572286820	71106656	-	-	-	-	-	-	-
adipocyte_9	1871956264	72261486	-	-	-	-	-	-	-
adipocyte_10	1616963036	84209902	-	-	-	-	-	-	-
adipocyte_11	1767251960	77374692	-	-	-	-	-	-	-
adipocyte_12	1766505052	71602422	-	-	-	-	-	-	-
adipocyte_13	1581009882	82648960	-	-	-	-	-	-	-
adipocyte_14	1660419814	71019398	-	-	-	-	-	-	-
adipocyte_15	818524954	216417202	-	-	-	-	-	-	-
adipocyte_16	744070516	212867234	-	-	-	-	-	-	-
adipocyte_17	752122882	196881982	-	-	-	-	-	-	-
adipocyte_18	767805798	207939966	-	-	-	-	-	-	-
adipocyte_19	1547521514	281365350	139059537	133863272	150334753	109347848	133320340	108609916	139590828
adipocyte_20	1003464374	311343326	134682030	145324935	149383662	131159339	107580742	143532500	122408305
adipocyte_21	1092603452	262753230	150470679	137562635	130087018	154014104	118955826	154103491	128046758
fibroblast_1	1417495256	312003062	135018690	191760954	129134866	140474233	146280520	120172272	154570627
fibroblast_2	678949080	273100496	107054628	118227322	119027460	115326070	102319428	116998412	135735350
fibroblast_3	595078808	276543646	99846642	144934917	120037878	102658218	112773682	91751322	117269103
fibroblast_4	737766814	268425876	114385652	102994943	112490274	134632711	106369066	101292797	118801390
islet_1	2199260114	70561284	-	-	-	-	-	-	-
islet_2	1651158310	56274156	-	-	-	-	-	-	-
islet_3	1536862768	68628258	145079240	-	-	103056594	124597145	60111703	188608452
islet_4	1538276826	63716298	190019647	193266077	232394590	98688358	218164347	170129311	265354128
islet_5	1625695990	63805918	131263199	115178935	134473482	87203846	91738793	113900054	136282127
islet_6	759399372	203770152	-	-	-	-	-	-	-
islet_7	1156611516	252108658	116154939	119464867	110093672	135692578	139438993	116690374	144227239
islet_8	1139143904	239427414	112859135	133897190	109703911	118516012	134813464	105497934	113706336
islet_9	814515092	223410464	147608400	145476870	111054766	132119829	139112537	120508236	147306888
kidney_1	1895159642	67096774	-	-	-	-	-	-	-
kidney_2	1828997074	65240756	-	-	-	-	-	-	-
kidney_3	1751997494	74297684	-	-	-	-	-	-	-
kidney_4	1526581744	69145732	-	-	-	-	-	-	-
kidney_5	1597567704	70497404	91754569	197042102	171093740	190296594	240191334	163058417	128249783
kidney_6	760425128	246223160	92198276	109057233	103036175	104563968	50321750	132306714	86313007
kidney_7	785210168	246331082	109280477	118746568	43006237	78115262	73144424	82840075	133479453
kidney_8	753387518	238228218	100407604	74775657	113639788	51598929	100396855	151427239	161864410
kidney_9	773779252	228543870	-	-	-	-	-	-	-
kidney_10	787883084	256562316	157317511	152596011	165426439	171884123	138315233	143551089	101001273
smc_1	1574811038	379944872	146458029	138826125	118855447	124158393	127290428	113365738	143811632
smc_2	1479362814	409703200	153797744	162314650	110339119	109150760	155976677	111586942	165676305
smc_3	1627202240	404727360	149845953	148366749	113559734	81258525	129746621	116672864	147704358
smc_4	1720485190	454491060	145879729	144793418	130490620	78054157	143678048	112090607	152539358
smc_5	1531654520	376430656	126844546	134758710	100541212	120106398	188683029	111459236	148938981
smc_6	1689863470	536021400	146549076	144672674	99128774	98669615	135903011	99923937	137221310
smc_7	1545088688	405043324	134199308	136475340	101851996	105230074	158386482	91806099	152328725
smc_8	1087483984	423724506	159180687	151424130	111609250	92894578	142037106	95990749	154783134
average reads	1.3583e+09	1.93682e+08	1.32201e+08	1.39832e+08	1.23632e+08	1.14187e+08	1.33059e+08	1.17284e+08	1.43301e+08
