# Supplementary material for: Integrated Analysis of Tissue-Specific Promoter Methylation and Gene Expression Profile in Complex Diseases
Source: Int J Mol Sci. 2020 Jul 17;21(14):5056. doi: 10.3390/ijms21145056 (PMC7404266; doi:10.3390/ijms21145056)
Supplement: Supplementary file 1 [file ijms-21-05056-s001.zip › Table_S7_Characteristics of 52 subjects for sequencing data.xlsx]

## Sheet: Table S7
Table S7. Characteristics of 52 subjects for sequencing data
	Adipocyte	Islet	Kidney	Fibroblast	SMC
N	21	9	10	4	8
Gender (male)	11 (52.38%)	4 (44.44%)	8 (80%)	0 (0%)	3 (37.5%)
Age (years)	58.86 ± 9.48	49.33 ± 12.72	58.1 ± 9.87	40.33 ± 23.23	54.88 ± 17.67
BMI (kg/m2)	27.51 ± 5.81	23.67 ± 2.6	22.84 ± 2.62	-	-
