# Supplementary material for: Integrated Analysis of Tissue-Specific Promoter Methylation and Gene Expression Profile in Complex Diseases
Source: Int J Mol Sci. 2020 Jul 17;21(14):5056. doi: 10.3390/ijms21145056 (PMC7404266; doi:10.3390/ijms21145056)
Supplement: Supplementary file 1 [file ijms-21-05056-s001.zip › Table_S8_General characteristics of the subjects for analysis on obesity-related differentially methylated CpGs.xlsx]

## Sheet: Table S8
Table S8. General characteristics of the subjects for analysis on obesity-related differentially methylated CpGs (* BMI > 30 kg/m2, † BMI > 27 kg/m2)
	Discovery (N=450)		Replication (N=759)		T2DM (N=1,536)
	Lean	Obese*	Lean	Obese†	Control	Case
N	250	200	475	284	889	647
Gender (male)	250 (100%)	200 (100%)	242 (50.95%)	135 (47.53%)	447 (50.28%)	364 (56.26 %)
Age (years)	47.2 ± 5.9	47.7 ± 5.9	60.02 ± 9.15	59.74 ± 8.62	57.76 ± 8.38	62.49 ± 8.64
BMI (kg/m2)	21.4 ± 1.1	31.6 ± 1.6	21.41 ± 1.08	28.91 ± 1.84	23.64 ± 2.77	25.34 ± 3.07
